# Supplementary material for: Prioritization of Fluorescence In Situ Hybridization (FISH) Probes for Differentiating Primary Sites of Neuroendocrine Tumors with Machine Learning
Source: MDPI journal article supplement (doi:10.3390/ijms242417401), 2023-12-12
Supplement: s1 [file s1]

## Supplementary Figures and Tables

**Supplementary Table S1.** Models and parameter values for hyperparameter tuning. Parameters were tuned with a grid search and 10-fold CV with training sets.

|                   |                                                             |
|-------------------|-------------------------------------------------------------|
| <b>DT</b>         |                                                             |
| <b>Parameter</b>  | <b>Values</b>                                               |
| mincut            | 2,3,4,5,6,7,8                                               |
| minsize           | 5,7,10,12,15                                                |
| mindev            | 0.1,0.01,0.001                                              |
| split             | gini, "deviance"                                            |
| best              | 2,4,5,6,7,8,9,10,12,15                                      |
| k                 | 0,1,2,3,4,5,6,7,8,9,10                                      |
| <b>RF</b>         |                                                             |
| <b>Parameter</b>  | <b>Values</b>                                               |
| mtry              | 2,8,13,18,24                                                |
| <b>lasso</b>      |                                                             |
| <b>Parameter</b>  | <b>Values</b>                                               |
| alpha             | 1                                                           |
| lambda            | 0.000019,0.00019,0.0019,0.019,0.19                          |
| <b>NB</b>         |                                                             |
| <b>Parameter</b>  | <b>Values</b>                                               |
| laplace           | 0                                                           |
| <b>SVM-L</b>      |                                                             |
| <b>Parameter</b>  | <b>Values</b>                                               |
| C                 | 0.0625, 0.184, 0.54, 1.59, 4.67, 13.7, 40.3, 119, 348, 1024 |
| <b>SVM-P</b>      |                                                             |
| <b>Parameter</b>  | <b>Values</b>                                               |
| C                 | 0.05,0.25,1,4,16,20                                         |
| degree            | 1,2,3,4,5                                                   |
| scale             | 0.001,0.0012,0.015,0.17,1,2                                 |
| <b>SVM-RB</b>     |                                                             |
| <b>Parameter</b>  | <b>Values</b>                                               |
| C                 | 0.05,0.25,1,4,16,20                                         |
| sigma             | 0.01,0.03,0.05,0.07,0.09,0.1                                |
| <b>XGBTree</b>    |                                                             |
| <b>Parameter</b>  | <b>Values</b>                                               |
| nrounds           | 50,100,150,200,250                                          |
| max_depth         | 1,2,3,4,5                                                   |
| <b>Elasticnet</b> |                                                             |
| <b>Parameter</b>  | <b>Values</b>                                               |
| alpha             | 0.1,0.325,0.55,0.775,1                                      |
| lambda            | 0.000019,0.00019,0.0019,0.019,0.19                          |

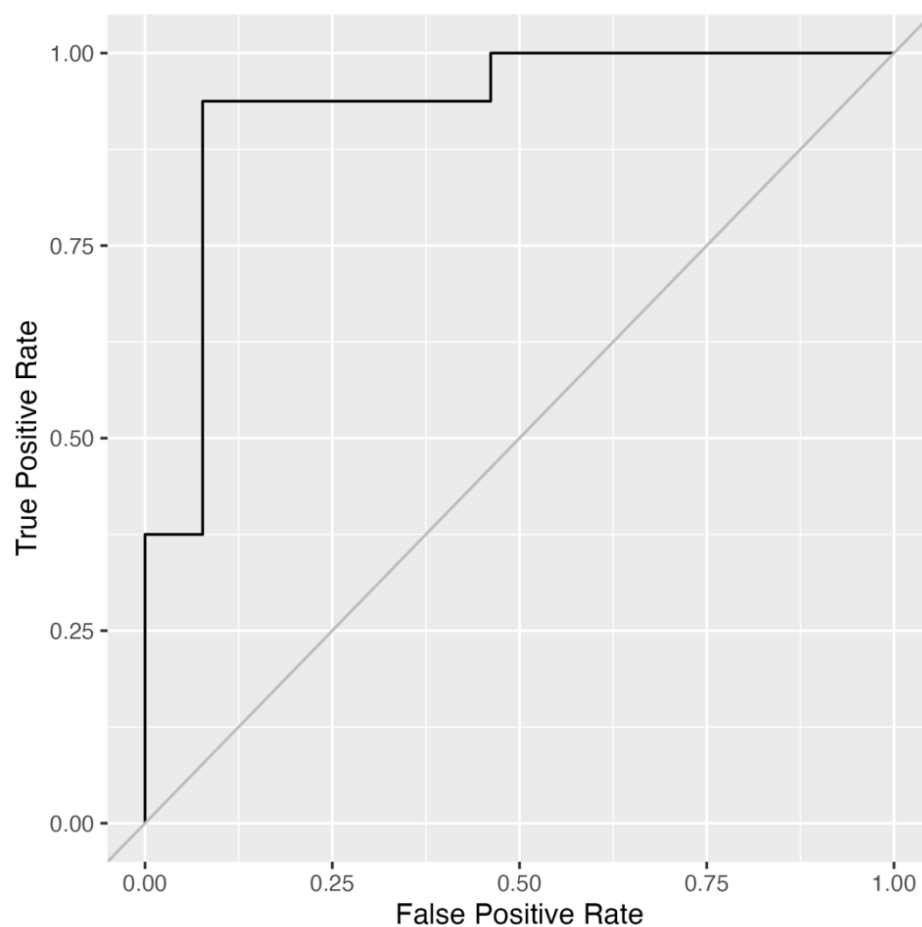

**Supplementary Figure S1.** ROC curve for Naïve bayes model trained on raw dataset. AUROC curve = 0.928.

**Supplementary Table S2.** Parameters of top models from top performing datasets.

Supplementary Table S21: Parameters of top models from top performing datasets.

| Top Models - Raw Dataset                                                                                    |         |           |        |          |                               |
|-------------------------------------------------------------------------------------------------------------|---------|-----------|--------|----------|-------------------------------|
|                                                                                                             | laplace |           |        |          |                               |
| NB                                                                                                          | 0       |           |        |          |                               |
|                                                                                                             | nrounds | max depth |        |          |                               |
| XGBTree                                                                                                     | 50      | 5         |        |          |                               |
| Top Models - Median-Imputed Dataset                                                                         |         |           |        |          |                               |
|                                                                                                             | C       | sigma     |        |          |                               |
| SVM-RB                                                                                                      | 4       | 0.01      |        |          |                               |
|                                                                                                             | mincut  | minsize   | mindev | split    | pruning parameter (best or k) |
| DT                                                                                                          | 5       | 10        | 0.01   | gini     | best=10                       |
| Top DT Models from Manual Monte Carlo CV - KNN-Imputed Data with Single Categorical Variable Transformation |         |           |        |          |                               |
| Decision Tree Models                                                                                        | mincut  | minsize   | mindev | split    | pruning parameter (best or k) |
| Training Set 1                                                                                              | 6       | 15        | 0.01   | deviance | best=10                       |
| Training Set 2                                                                                              | 5       | 10        | 0.01   | deviance | best=4                        |
| Training Set 3                                                                                              | 5       | 15        | 0.01   | gini     | k=2                           |

|                              |               |                |               |              |                          |
|------------------------------|---------------|----------------|---------------|--------------|--------------------------|
| Training Set 4               | 6             | 12             | 0.1           | gini         | best=4                   |
| Training Set 5               | 6             | 15             | 0.01          | deviance     | k=3                      |
| Training Set 6               | 5             | 12             | 0.001         | deviance     | best=15                  |
| Training Set 7               | 2             | 5              | 0.1           | gini         | best=2                   |
| Training Set 8               | 2             | 5              | 0.1           | gini         | k=8                      |
| Training Set 9               | 3             | 15             | 0.1           | gini         | k=1                      |
| Training Set 10              | 2             | 5              | 0.1           | gini         | best=2                   |
| <b>Full Dataset DT model</b> |               |                |               |              |                          |
|                              | <b>mincut</b> | <b>minsize</b> | <b>mindev</b> | <b>split</b> | <b>pruning parameter</b> |
| Full Dataset                 | 4             | 10             | 0.01          | deviance     | best=4                   |

**Supplementary Table S3.** Test set performance metrics for all models on four imputed datasets. Imputation methods used were impute by mean, median, KNN, and bagged trees models.

|                      |                    |                 |              |                    |                    |                    |
|----------------------|--------------------|-----------------|--------------|--------------------|--------------------|--------------------|
| <b>Impute Mean</b>   |                    |                 |              |                    |                    |                    |
|                      | <b>Brier Score</b> | <b>Accuracy</b> | <b>Kappa</b> | <b>AUROC Curve</b> | <b>Sensitivity</b> | <b>Specificity</b> |
| DT                   | 0.265              | 65.5%           | 0.322        | 0.692              | 0.563              | 0.769              |
| RF                   | 0.096              | 86.2%           | 0.725        | 0.959              | 0.813              | 0.923              |
| lasso                | 0.165              | 75.9%           | 0.494        | 0.822              | 0.938              | 0.539              |
| NB                   | 0.105              | 89.7%           | 0.789        | 0.966              | 0.938              | 0.846              |
| SVM-L                | 0.136              | 86.2%           | 0.717        | 0.875              | 0.938              | 0.769              |
| SVM-P                | 0.100              | 86.2%           | 0.717        | 0.904              | 0.938              | 0.769              |
| SVM-RB               | 0.069              | 93.1%           | 0.861        | 0.981              | 0.938              | 0.923              |
| XGBTree              | 0.145              | 79.3%           | 0.576        | 0.880              | 0.875              | 0.692              |
| Elasticnet           | 0.148              | 82.8%           | 0.644        | 0.889              | 0.938              | 0.692              |
| Log Reg              | 0.069              | 93.1%           | 0.861        | 0.981              | 0.938              | 0.923              |
| <b>Impute Median</b> |                    |                 |              |                    |                    |                    |
|                      | <b>Brier Score</b> | <b>Accuracy</b> | <b>Kappa</b> | <b>AUROC Curve</b> | <b>Sensitivity</b> | <b>Specificity</b> |
| DT                   | 0.183              | 72.4%           | 0.442        | 0.820              | 0.750              | 0.692              |
| RF                   | 0.095              | 86.2%           | 0.721        | 0.971              | 0.875              | 0.846              |
| lasso                | 0.139              | 75.9%           | 0.494        | 0.914              | 0.938              | 0.539              |
| NB                   | 0.102              | 89.7%           | 0.792        | 0.942              | 0.875              | 0.923              |
| SVM-L                | 0.138              | 82.8%           | 0.649        | 0.894              | 0.875              | 0.769              |
| SVM-P                | 0.095              | 89.7%           | 0.789        | 0.909              | 0.938              | 0.846              |
| SVM-RB               | 0.066              | 93.1%           | 0.861        | 0.986              | 0.938              | 0.923              |
| XGBTree              | 0.098              | 89.7%           | 0.792        | 0.923              | 0.875              | 0.923              |
| Elasticnet           | 0.122              | 82.8%           | 0.644        | 0.923              | 0.938              | 0.692              |
| Log Reg              | 0.066              | 93.1%           | 0.861        | 0.986              | 0.938              | 0.923              |
| <b>Impute KNN</b>    |                    |                 |              |                    |                    |                    |
|                      | <b>Brier Score</b> | <b>Accuracy</b> | <b>Kappa</b> | <b>AUROC Curve</b> | <b>Sensitivity</b> | <b>Specificity</b> |
| DT                   | 0.200              | 72.4%           | 0.450        | 0.776              | 0.688              | 0.769              |
| RF                   | 0.110              | 86.2%           | 0.721        | 0.918              | 0.875              | 0.846              |
| lasso                | 0.144              | 75.9%           | 0.501        | 0.885              | 0.875              | 0.615              |

|                                  |                    |                 |              |                    |                    |                    |
|----------------------------------|--------------------|-----------------|--------------|--------------------|--------------------|--------------------|
| NB                               | 0.105              | 89.7%           | 0.792        | 0.952              | 0.875              | 0.923              |
| SVM-L                            | 0.132              | 82.8%           | 0.649        | 0.904              | 0.875              | 0.769              |
| SVM-P                            | 0.108              | 86.2%           | 0.721        | 0.904              | 0.875              | 0.846              |
| SVM-RB                           | 0.077              | 89.7%           | 0.792        | 0.976              | 0.875              | 0.923              |
| XGBTree                          | 0.167              | 75.9%           | 0.516        | 0.822              | 0.750              | 0.769              |
| Elasticnet                       | 0.140              | 75.9%           | 0.501        | 0.885              | 0.875              | 0.615              |
| Log Reg                          | 0.077              | 89.7%           | 0.792        | 0.976              | 0.875              | 0.923              |
| <b>Impute Bagged Tree Models</b> |                    |                 |              |                    |                    |                    |
|                                  | <b>Brier Score</b> | <b>Accuracy</b> | <b>Kappa</b> | <b>AUROC Curve</b> | <b>Sensitivity</b> | <b>Specificity</b> |
| DT                               | 0.206              | 69.0%           | 0.359        | 0.745              | 0.813              | 0.539              |
| RF                               | 0.102              | 89.7%           | 0.789        | 0.947              | 0.938              | 0.846              |
| lasso                            | 0.165              | 79.3%           | 0.569        | 0.817              | 0.938              | 0.615              |
| NB                               | 0.103              | 89.7%           | 0.792        | 0.986              | 0.875              | 0.923              |
| SVM-L                            | 0.121              | 86.2%           | 0.717        | 0.880              | 0.938              | 0.769              |
| SVM-P                            | 0.104              | 89.7%           | 0.789        | 0.923              | 0.938              | 0.846              |
| SVM-RB                           | 0.068              | 93.1%           | 0.861        | 0.962              | 0.938              | 0.923              |
| XGBTree                          | 0.131              | 75.9%           | 0.516        | 0.904              | 0.750              | 0.769              |
| Elasticnet                       | 0.152              | 79.3%           | 0.569        | 0.841              | 0.938              | 0.615              |
| Log Reg                          | 0.068              | 93.1%           | 0.861        | 0.962              | 0.938              | 0.923              |

**Supplementary Table S4.** Mean 10-fold CV training set performance metrics for all models on four imputed datasets with a transformation of the data to single categorical variables for each biomarker. Imputation methods used were impute by mean, median, KNN, and bagged trees models.

|                      |                    |                 |              |                    |                    |                    |
|----------------------|--------------------|-----------------|--------------|--------------------|--------------------|--------------------|
| <b>Impute Mean</b>   |                    |                 |              |                    |                    |                    |
|                      | <b>Brier Score</b> | <b>Accuracy</b> | <b>Kappa</b> | <b>AUROC Curve</b> | <b>Sensitivity</b> | <b>Specificity</b> |
| DT                   | 0.184              | 71.2%           | 0.395        | 0.776              | 0.755              | 0.645              |
| RF                   | 0.174              | 77.2%           | 0.499        | 0.797              | 0.898              | 0.580              |
| lasso                | 0.186              | 77.2%           | 0.471        | 0.710              | 0.955              | 0.490              |
| NB                   | 0.193              | 75.6%           | 0.453        | 0.721              | 0.912              | 0.515              |
| SVM-L                | 0.180              | 75.6%           | 0.424        | 0.787              | 0.969              | 0.430              |
| SVM-P                | 0.179              | 76.4%           | 0.443        | 0.784              | 0.969              | 0.450              |
| SVM-RB               | 0.178              | 75.6%           | 0.426        | 0.763              | 0.955              | 0.450              |
| XGBTree              | 0.177              | 72.1%           | 0.414        | 0.784              | 0.767              | 0.650              |
| Elasticnet           | 0.186              | 77.2%           | 0.471        | 0.710              | 0.955              | 0.490              |
| Log Reg              | 0.199              | 70.6%           | 0.362        | 0.754              | 0.798              | 0.560              |
| <b>Impute Median</b> |                    |                 |              |                    |                    |                    |
|                      | <b>Brier Score</b> | <b>Accuracy</b> | <b>Kappa</b> | <b>AUROC Curve</b> | <b>Sensitivity</b> | <b>Specificity</b> |
| DT                   | 0.186              | 73.7%           | 0.420        | 0.771              | 0.864              | 0.540              |
| RF                   | 0.187              | 76.6%           | 0.474        | 0.766              | 0.898              | 0.560              |
| lasso                | 0.180              | 77.4%           | 0.484        | 0.770              | 0.941              | 0.520              |
| NB                   | 0.192              | 75.7%           | 0.466        | 0.752              | 0.883              | 0.565              |
| SVM-L                | 0.171              | 78.2%           | 0.499        | 0.754              | 0.955              | 0.520              |

|                                  |                    |                 |              |                    |                    |                    |
|----------------------------------|--------------------|-----------------|--------------|--------------------|--------------------|--------------------|
| SVM-P                            | 0.170              | 77.4%           | 0.484        | 0.811              | 0.941              | 0.520              |
| SVM-RB                           | 0.168              | 77.4%           | 0.484        | 0.843              | 0.941              | 0.520              |
| XGBTree                          | 0.177              | 76.6%           | 0.469        | 0.778              | 0.926              | 0.520              |
| Elasticnet                       | 0.180              | 77.4%           | 0.484        | 0.770              | 0.941              | 0.520              |
| Log Reg                          | 0.202              | 72.4%           | 0.395        | 0.750              | 0.841              | 0.540              |
| <b>Impute KNN</b>                |                    |                 |              |                    |                    |                    |
|                                  | <b>Brier Score</b> | <b>Accuracy</b> | <b>Kappa</b> | <b>AUROC Curve</b> | <b>Sensitivity</b> | <b>Specificity</b> |
| DT                               | 0.180              | 78.2%           | 0.524        | 0.781              | 0.883              | 0.630              |
| RF                               | 0.176              | 74.0%           | 0.443        | 0.806              | 0.812              | 0.630              |
| lasso                            | 0.172              | 79.1%           | 0.543        | 0.797              | 0.883              | 0.650              |
| NB                               | 0.205              | 74.1%           | 0.440        | 0.806              | 0.843              | 0.590              |
| SVM-L                            | 0.169              | 79.1%           | 0.532        | 0.801              | 0.926              | 0.590              |
| SVM-P                            | 0.168              | 79.1%           | 0.532        | 0.790              | 0.926              | 0.590              |
| SVM-RB                           | 0.168              | 79.1%           | 0.537        | 0.786              | 0.912              | 0.610              |
| XGBTree                          | 0.175              | 79.1%           | 0.543        | 0.799              | 0.883              | 0.650              |
| Elasticnet                       | 0.172              | 79.1%           | 0.543        | 0.797              | 0.883              | 0.650              |
| Log Reg                          | 0.210              | 71.3%           | 0.384        | 0.754              | 0.812              | 0.565              |
| <b>Impute Bagged Tree Models</b> |                    |                 |              |                    |                    |                    |
|                                  | <b>Brier Score</b> | <b>Accuracy</b> | <b>Kappa</b> | <b>AUROC Curve</b> | <b>Sensitivity</b> | <b>Specificity</b> |
| DT                               | 0.209              | 71.3%           | 0.375        | 0.723              | 0.826              | 0.545              |
| RF                               | 0.211              | 73.1%           | 0.395        | 0.726              | 0.883              | 0.495              |
| lasso                            | 0.192              | 77.5%           | 0.492        | 0.728              | 0.926              | 0.545              |
| NB                               | 0.204              | 74.1%           | 0.442        | 0.756              | 0.841              | 0.590              |
| SVM-L                            | 0.179              | 77.5%           | 0.492        | 0.744              | 0.926              | 0.545              |
| SVM-P                            | 0.179              | 77.5%           | 0.492        | 0.759              | 0.926              | 0.545              |
| SVM-RB                           | 0.181              | 77.5%           | 0.492        | 0.716              | 0.926              | 0.545              |
| XGBTree                          | 0.191              | 77.5%           | 0.492        | 0.740              | 0.926              | 0.545              |
| Elasticnet                       | 0.192              | 77.5%           | 0.492        | 0.728              | 0.926              | 0.545              |
| Log Reg                          | 0.206              | 70.7%           | 0.355        | 0.757              | 0.841              | 0.500              |

**Supplementary Table S5.** Test set performance metrics for all models on four imputed datasets with a transformation of the data to single categorical variables for each biomarker. Imputation methods used were impute by mean, median, KNN, and bagged trees models.

|                    |                    |                 |              |                    |                    |                    |
|--------------------|--------------------|-----------------|--------------|--------------------|--------------------|--------------------|
| <b>Impute Mean</b> |                    |                 |              |                    |                    |                    |
|                    | <b>Brier Score</b> | <b>Accuracy</b> | <b>Kappa</b> | <b>AUROC Curve</b> | <b>Sensitivity</b> | <b>Specificity</b> |
| DT                 | 0.212              | 65.5%           | 0.293        | 0.760              | 0.750              | 0.539              |
| RF                 | 0.147              | 75.9%           | 0.494        | 0.885              | 0.938              | 0.539              |
| lasso              | 0.199              | 72.4%           | 0.417        | 0.755              | 0.938              | 0.462              |
| NB                 | 0.175              | 75.9%           | 0.494        | 0.793              | 0.938              | 0.539              |
| SVM-L              | 0.189              | 72.4%           | 0.417        | 0.798              | 0.938              | 0.462              |
| SVM-P              | 0.186              | 72.4%           | 0.417        | 0.798              | 0.938              | 0.462              |
| SVM-RB             | 0.173              | 72.4%           | 0.417        | 0.880              | 0.938              | 0.462              |

|                                  |                    |                 |              |                    |                    |                    |
|----------------------------------|--------------------|-----------------|--------------|--------------------|--------------------|--------------------|
| XGBTree                          | 0.180              | 75.9%           | 0.494        | 0.813              | 0.938              | 0.539              |
| Elasticnet                       | 0.199              | 72.4%           | 0.417        | 0.755              | 0.938              | 0.462              |
| Log Reg                          | 0.173              | 72.4%           | 0.417        | 0.880              | 0.938              | 0.462              |
| <b>Impute Median</b>             |                    |                 |              |                    |                    |                    |
|                                  | <b>Brier Score</b> | <b>Accuracy</b> | <b>Kappa</b> | <b>AUROC Curve</b> | <b>Sensitivity</b> | <b>Specificity</b> |
| DT                               | 0.218              | 72.4%           | 0.417        | 0.668              | 0.938              | 0.462              |
| RF                               | 0.133              | 79.3%           | 0.569        | 0.930              | 0.938              | 0.615              |
| lasso                            | 0.177              | 75.9%           | 0.494        | 0.858              | 0.938              | 0.539              |
| NB                               | 0.172              | 75.9%           | 0.501        | 0.839              | 0.875              | 0.615              |
| SVM-L                            | 0.182              | 72.4%           | 0.417        | 0.772              | 0.938              | 0.462              |
| SVM-P                            | 0.163              | 75.9%           | 0.494        | 0.858              | 0.938              | 0.539              |
| SVM-RB                           | 0.158              | 79.3%           | 0.569        | 0.916              | 0.938              | 0.615              |
| XGBTree                          | 0.170              | 75.9%           | 0.494        | 0.815              | 0.938              | 0.539              |
| Elasticnet                       | 0.177              | 75.9%           | 0.494        | 0.858              | 0.938              | 0.539              |
| Log Reg                          | 0.158              | 79.3%           | 0.569        | 0.916              | 0.938              | 0.615              |
| <b>Impute KNN</b>                |                    |                 |              |                    |                    |                    |
|                                  | <b>Brier Score</b> | <b>Accuracy</b> | <b>Kappa</b> | <b>AUROC Curve</b> | <b>Sensitivity</b> | <b>Specificity</b> |
| DT                               | 0.157              | 82.8%           | 0.654        | 0.841              | 0.813              | 0.846              |
| RF                               | 0.154              | 79.3%           | 0.582        | 0.873              | 0.813              | 0.769              |
| lasso                            | 0.177              | 75.9%           | 0.509        | 0.803              | 0.813              | 0.692              |
| NB                               | 0.180              | 79.3%           | 0.582        | 0.861              | 0.813              | 0.769              |
| SVM-L                            | 0.174              | 75.9%           | 0.509        | 0.808              | 0.813              | 0.692              |
| SVM-P                            | 0.176              | 75.9%           | 0.509        | 0.793              | 0.813              | 0.692              |
| SVM-RB                           | 0.169              | 79.3%           | 0.582        | 0.817              | 0.813              | 0.769              |
| XGBTree                          | 0.183              | 75.9%           | 0.509        | 0.781              | 0.813              | 0.692              |
| Elasticnet                       | 0.177              | 75.9%           | 0.509        | 0.803              | 0.813              | 0.692              |
| Log Reg                          | 0.169              | 79.3%           | 0.582        | 0.817              | 0.813              | 0.769              |
| <b>Impute Bagged Tree Models</b> |                    |                 |              |                    |                    |                    |
|                                  | <b>Brier Score</b> | <b>Accuracy</b> | <b>Kappa</b> | <b>AUROC Curve</b> | <b>Sensitivity</b> | <b>Specificity</b> |
| DT                               | 0.205              | 75.9%           | 0.494        | 0.671              | 0.938              | 0.539              |
| RF                               | 0.132              | 79.3%           | 0.563        | 0.916              | 1.000              | 0.539              |
| lasso                            | 0.204              | 72.4%           | 0.417        | 0.704              | 0.938              | 0.462              |
| NB                               | 0.175              | 72.4%           | 0.426        | 0.858              | 0.875              | 0.539              |
| SVM-L                            | 0.200              | 72.4%           | 0.417        | 0.762              | 0.938              | 0.462              |
| SVM-P                            | 0.200              | 72.4%           | 0.417        | 0.829              | 0.938              | 0.462              |
| SVM-RB                           | 0.198              | 72.4%           | 0.417        | 0.839              | 0.938              | 0.462              |
| XGBTree                          | 0.196              | 72.4%           | 0.417        | 0.743              | 0.938              | 0.462              |
| Elasticnet                       | 0.204              | 72.4%           | 0.417        | 0.704              | 0.938              | 0.462              |
| Log Reg                          | 0.198              | 72.4%           | 0.417        | 0.839              | 0.938              | 0.462              |

Supplementary Table S6. Counts and probabilities of FISH test results across samples with KNN-imputed data.

| Counts of FISH Test Results     |       |       |       |       |       |        |       |       |
|---------------------------------|-------|-------|-------|-------|-------|--------|-------|-------|
|                                 | ERBB2 | CKS1B | FGFR3 | CSF1R | MET   | CDKN2A | SMAD4 | CCNE1 |
| Loss                            | 26    | 87    | 15    | 11    | 38    | 71     | 117   | 9     |
| Normal                          | 72    | 47    | 25    | 67    | 47    | 37     | 2     | 40    |
| Gain                            | 46    | 10    | 104   | 66    | 59    | 36     | 25    | 95    |
| Probability of FISH Test Result |       |       |       |       |       |        |       |       |
|                                 | ERBB2 | CKS1B | FGFR3 | CSF1R | MET   | CDKN2A | SMAD4 | CCNE1 |
| Loss                            | 0.181 | 0.604 | 0.104 | 0.076 | 0.264 | 0.493  | 0.813 | 0.063 |
| Normal                          | 0.500 | 0.326 | 0.174 | 0.465 | 0.326 | 0.257  | 0.014 | 0.278 |
| Gain                            | 0.319 | 0.069 | 0.722 | 0.458 | 0.410 | 0.250  | 0.174 | 0.660 |

Supplementary Table S7. Percentages of sbNET samples in the full dataset and ten training sets from the ten random 80/20 splits for Monte Carlo CV.

|                               | All Data | Fold 1 | Fold 2 | Fold 3 | Fold 4 | Fold 5 | Fold 6 | Fold 7 | Fold 8 | Fold 9 | Fold 10 |
|-------------------------------|----------|--------|--------|--------|--------|--------|--------|--------|--------|--------|---------|
| sbNET training set percentage | 59.0%    | 60.0%  | 58.3%  | 59.1%  | 58.3%  | 64.4%  | 57.4%  | 53.9%  | 58.3%  | 62.6%  | 58.3%   |

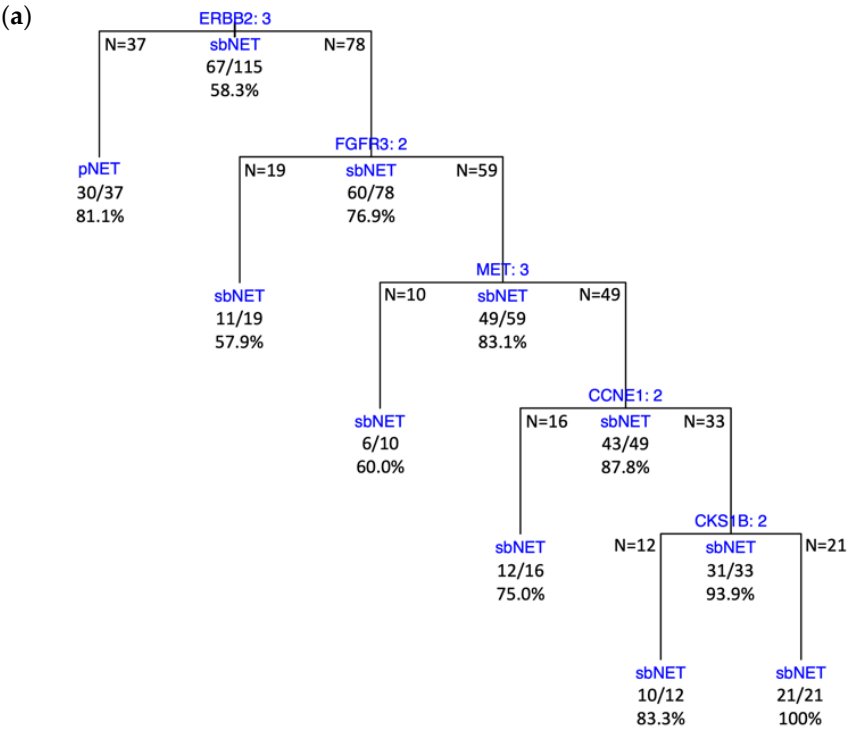

(b)

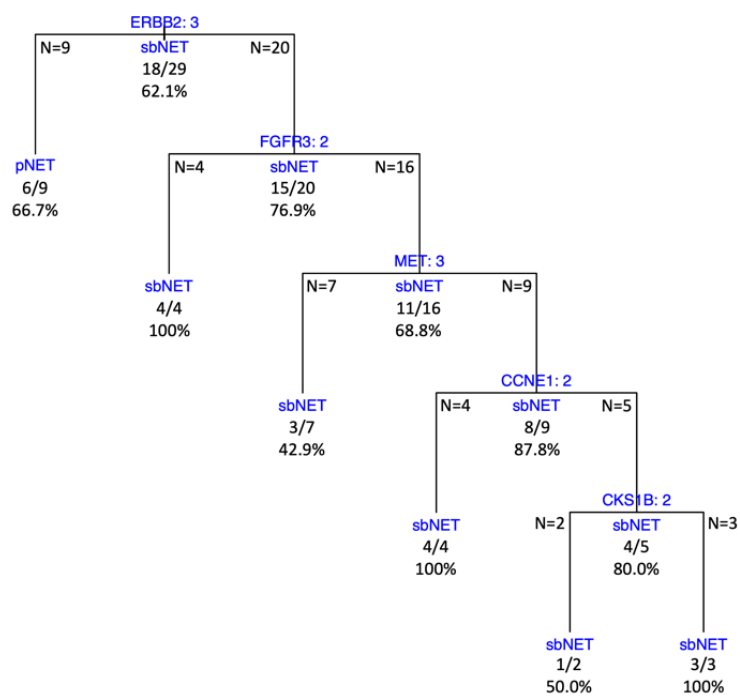

(c)

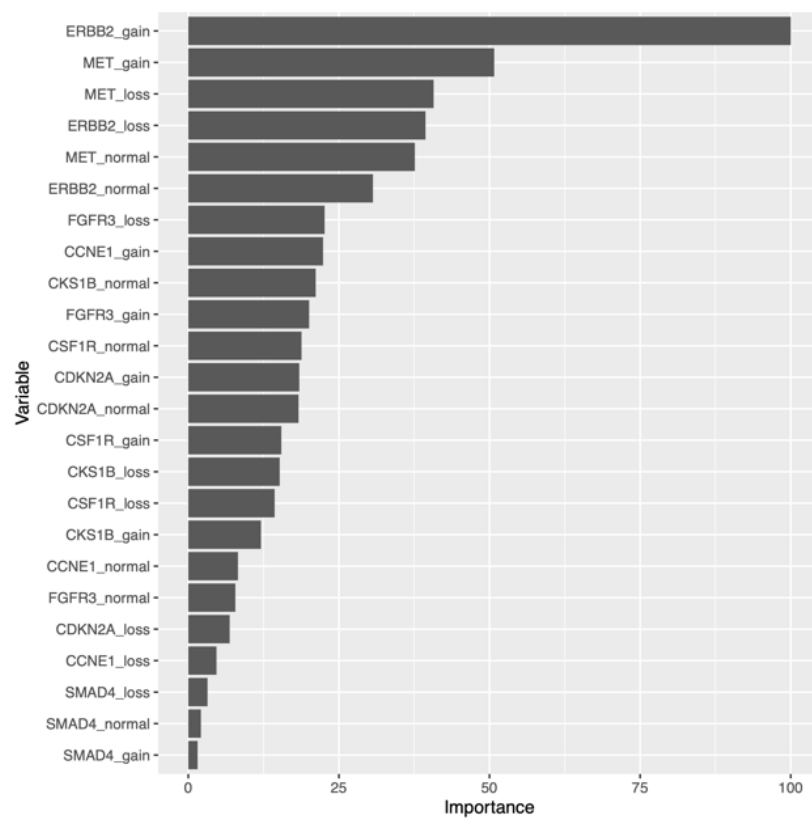

(d)

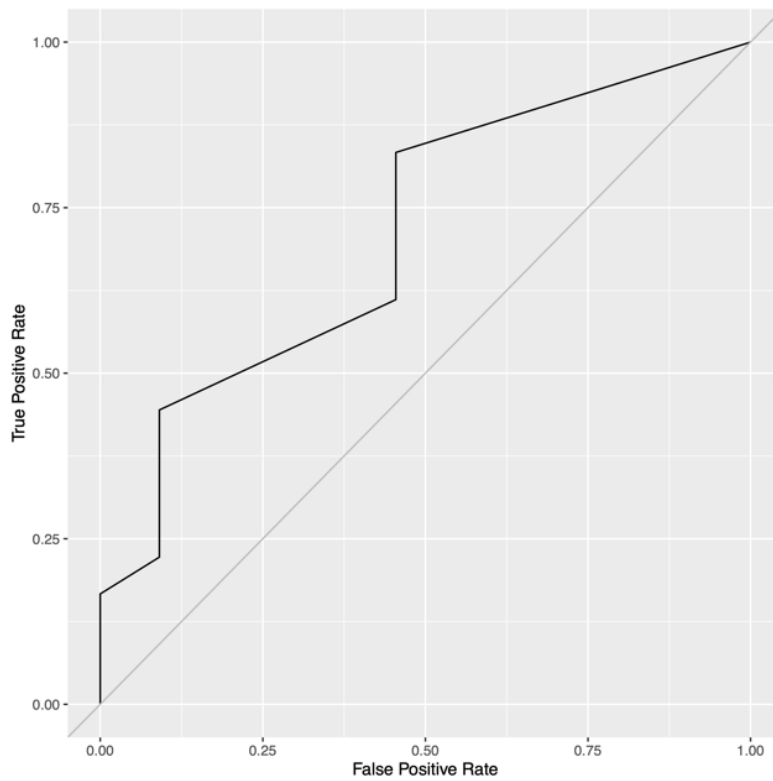

**Supplementary Figure S2.** DT model trained on KNN-imputed data with a transformation of the data to single categorical variables for each biomarker. Training and test sets constructed with random 80/20 dataset split (Training and Test Set 2) for manual Monte Carlo CV. **(a)** Training set DT model plot with internal nodes shown with variables being split with splitting criteria of 1 = loss, 2 = normal, and 3 = gain for number of copies at the genomic regions. Samples with a variable value equal to the splitting criteria are split down the left branch and values different than the splitting criteria are split down the right branch. Terminal nodes show the final classification of the samples with either pNET or sbNET. Classification of sample subsets at internal nodes are shown under horizontal lines and sample numbers of subsets from the split are displayed at the edges of the horizontal lines. Each node lists correctly classified samples as a fraction and percent accuracy. Tree accuracy = 78.3% (90/115) **(b)** Test set DT model plot with same design as (a) with test set data. Tree accuracy = 72.4% (21/29). **(c)** Permutation-based variable importance. All variables included in the model are assessed. Permutations per variable were performed 25 times and performance is assessed based on mean brier score. **(d)** ROC curve. AUROC curve = 0.710.

(a)

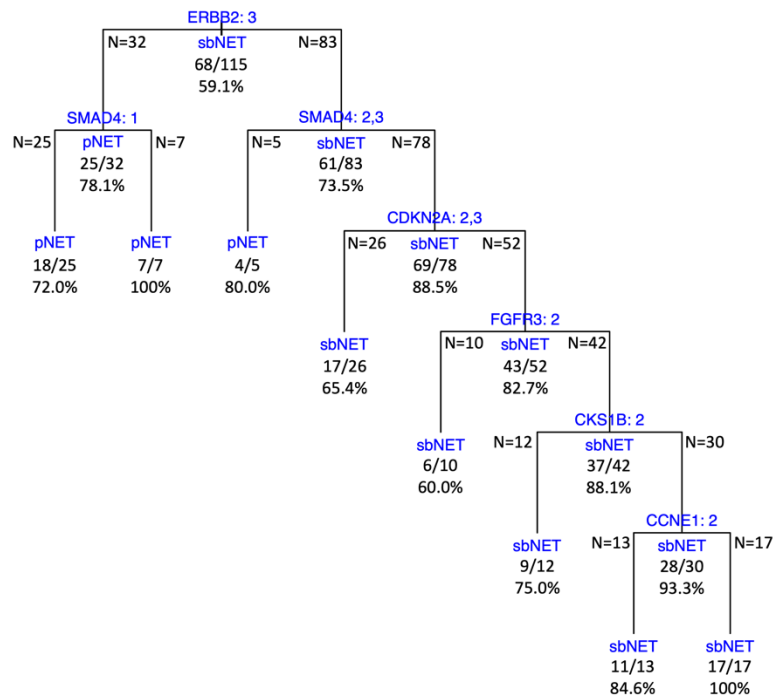

(b)

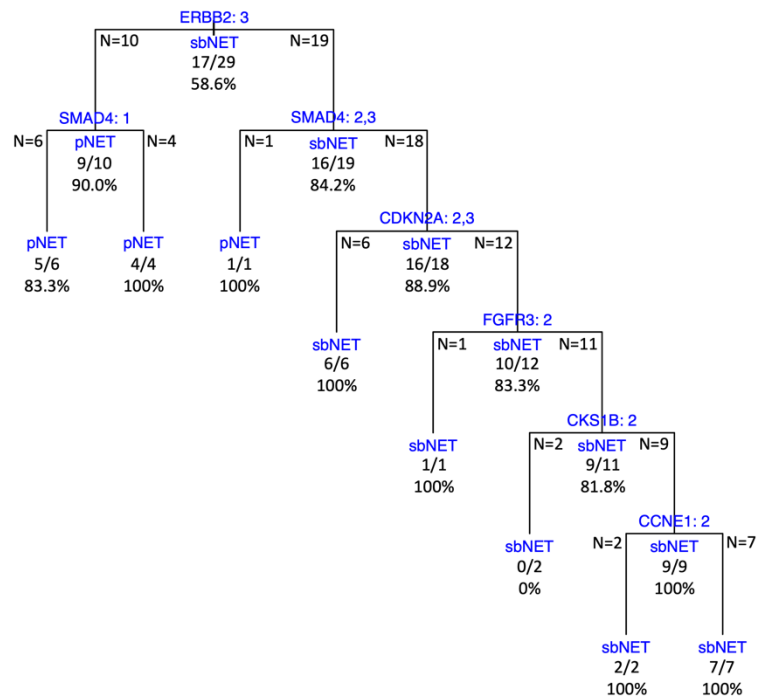

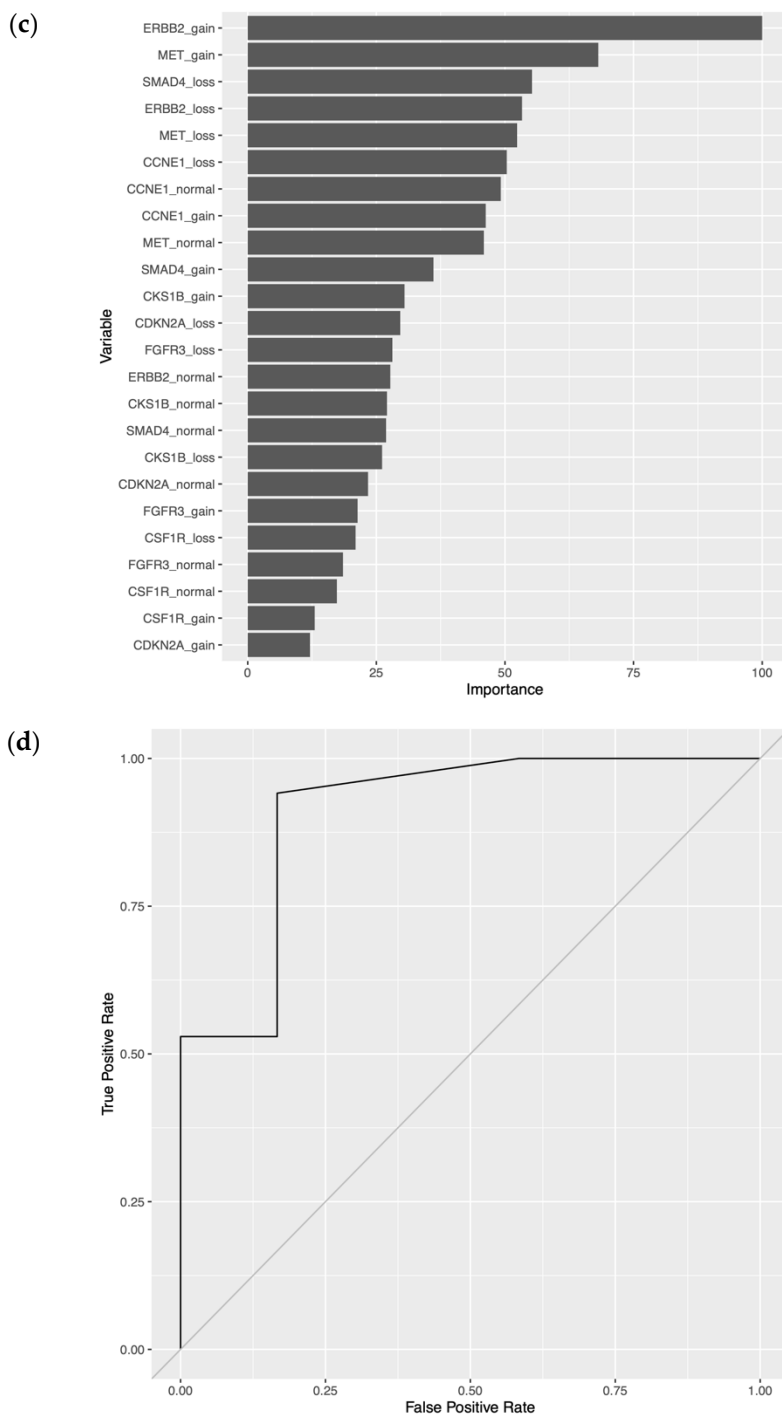

**Supplementary Figure S3.** DT model trained on KNN-imputed data with a transformation of the data to single categorical variables for each biomarker. Training and test sets constructed with random 80/20 dataset split (Training and Test Set 3) for manual Monte Carlo CV. **(a)** Training set DT model plot with internal nodes shown with variables being split with splitting criteria of 1 = loss, 2 = normal, and 3 = gain for number of copies at the genomic regions. Samples with a variable value equal to the splitting criteria are split down the left branch and values different than the splitting criteria are split down the right branch. Terminal nodes show the final classification of the samples with either pNET or sbNET. Classification of sample subsets at internal nodes are shown under horizontal lines and sample numbers of subsets from the split are displayed at the edges of the horizontal lines. Each node lists correctly classified samples as a fraction and percent accuracy. Tree accuracy = 77.4% (89/115) **(b)** Test set DT model plot with same design as (a) with test set data. Tree accuracy = 89.7% (26/29) **(c)** Permutation-based variable importance. All variables included in the model are assessed. Permutations per variable were performed 25 times and performance is assessed based on mean brier score. **(d)** ROC curve. AUROC curve = 0.909.

(a)

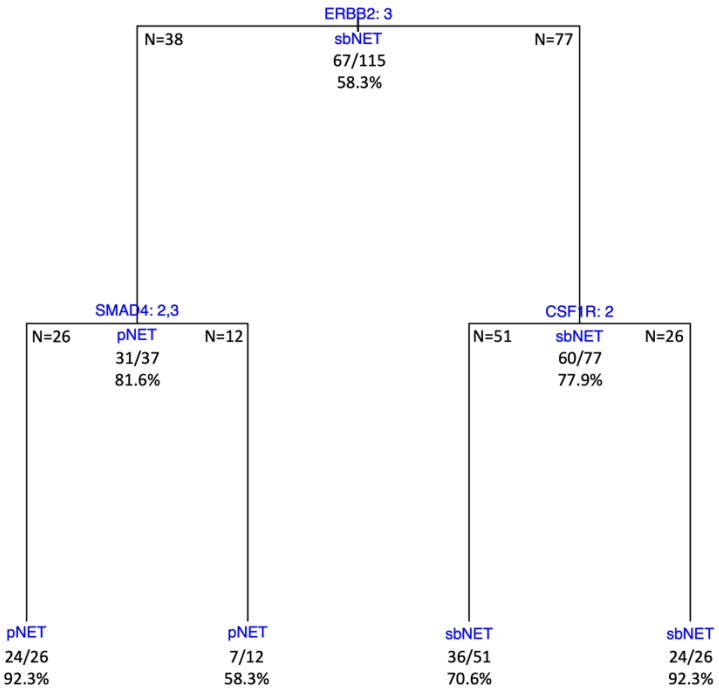

(b)

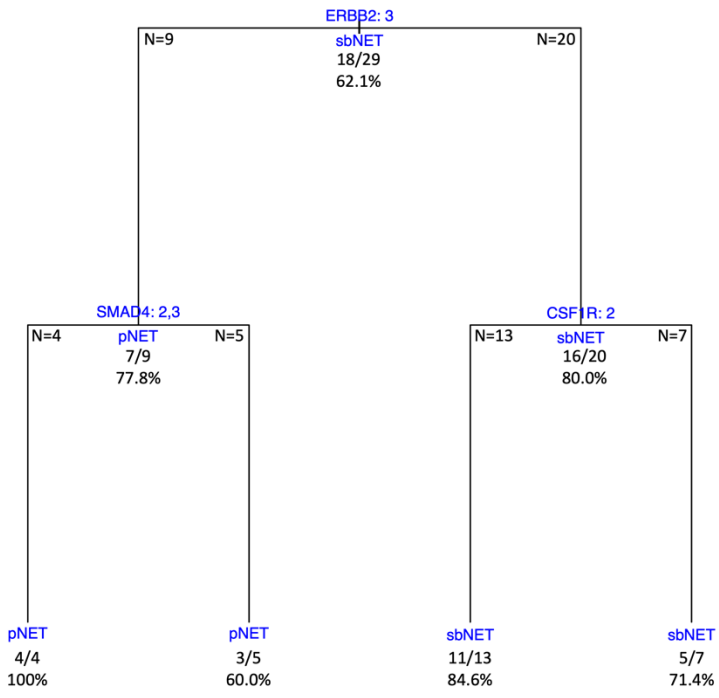

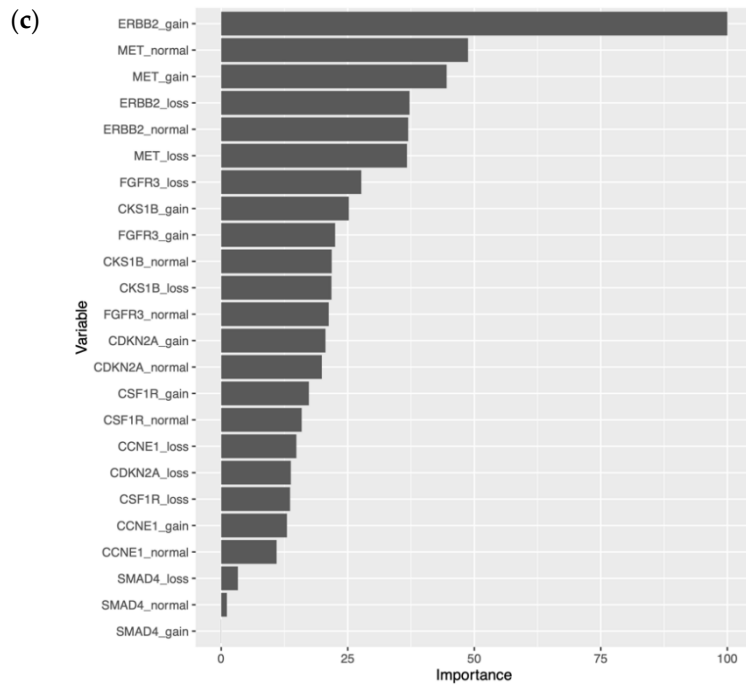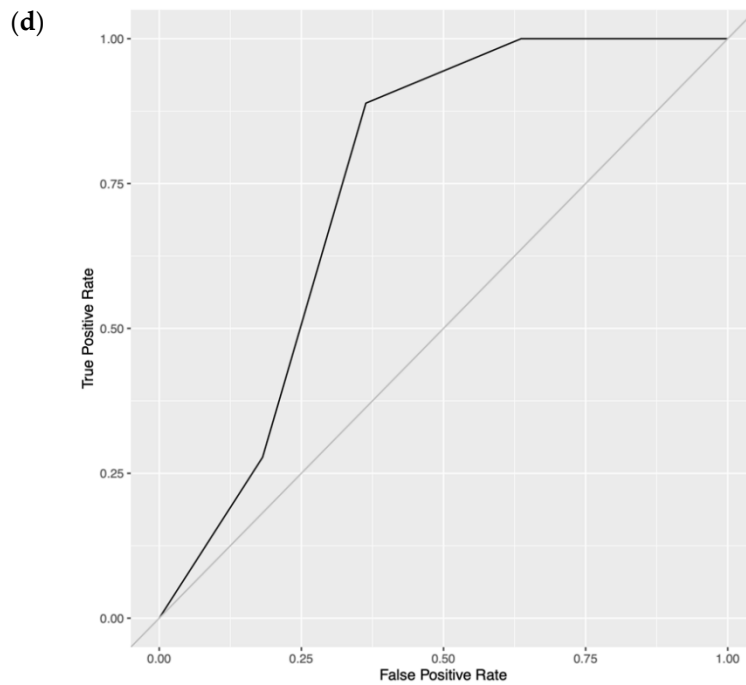

**Supplementary Figure S4.** DT model trained on KNN-imputed data with a transformation of the data to single categorical variables for each biomarker. Training and test sets constructed with random 80/20 dataset split (Training and Test Set 4) for manual Monte Carlo CV. **(a)** Training set DT model plot with internal nodes shown with variables being split with splitting criteria of 1 = loss, 2 = normal, and 3 = gain for number of copies at the genomic regions. Samples with a variable value equal to the splitting criteria are split down the left branch and values different than the splitting criteria are split down the right branch. Terminal nodes show the final classification of the samples with either pNET or sbNET. Classification of sample subsets at internal nodes are shown under horizontal lines and sample numbers of subsets from the split are displayed at the edges of the horizontal lines. Each node lists correctly classified samples as a fraction and percent accuracy. Tree accuracy = 79.1% (91/115). **(b)** Test set DT model plot with same design as (a) with test set data. Tree accuracy = 79.3% (23/29). **(c)** Permutation-based variable importance. All variables included in the model are assessed. Permutations per variable were performed 25 times and performance is assessed based on mean brier score. **(d)** ROC curve. AUROC curve = 0.753.

(a)

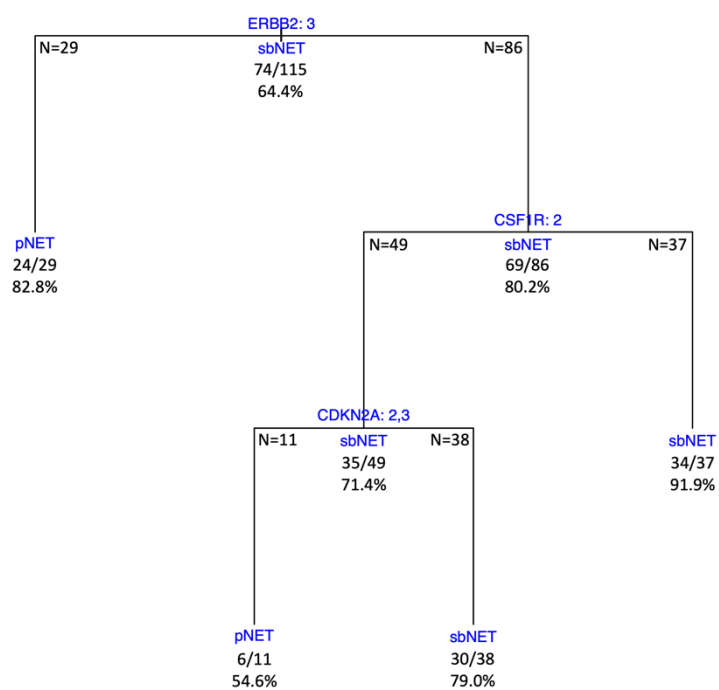

(b)

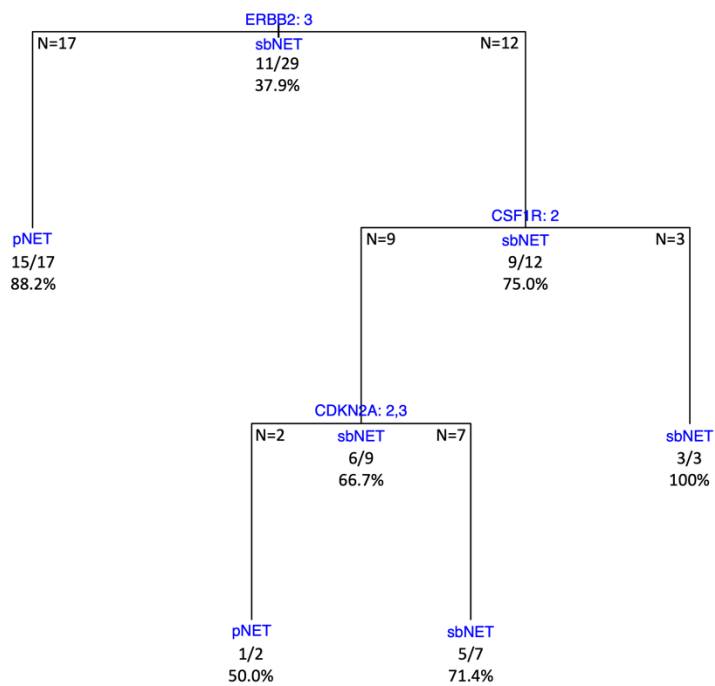

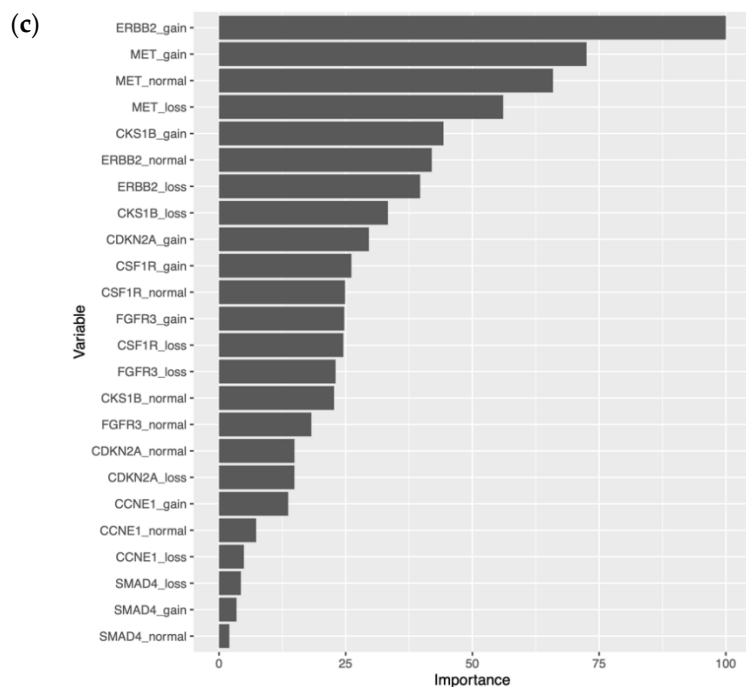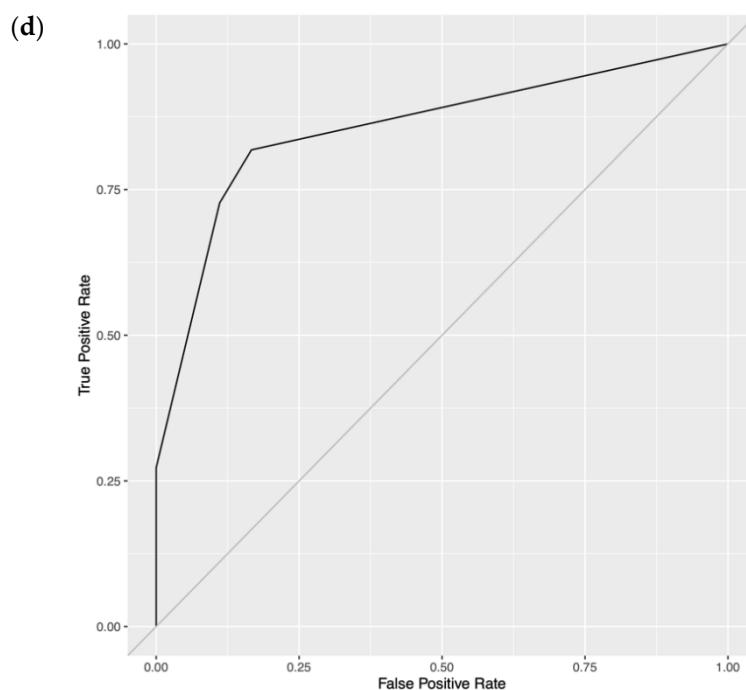

**Supplementary Figure S5.** DT model trained on KNN-imputed data with a transformation of the data to single categorical variables for each biomarker. Training and test sets constructed with random 80/20 dataset split (Training and Test Set 5) for manual Monte Carlo CV. **(a)** Training set DT model plot with internal nodes shown with variables being split with splitting criteria of 1 = loss, 2 = normal, and 3 = gain for number of copies at the genomic regions. Samples with a variable value equal to the splitting criteria are split down the left branch and values different than the splitting criteria are split down the right branch. Terminal nodes show the final classification of the samples with either pNET or sbNET. Classification of sample subsets at internal nodes are shown under horizontal lines and sample numbers of subsets from the split are displayed at the edges of the horizontal lines. Each node lists correctly classified samples as a fraction and percent accuracy. Tree accuracy = 81.7% (94/115) **(b)** Test set DT model plot with same design as (a) with test set data. Tree accuracy = 82.8% (24/29) **(c)** Permutation-based variable importance. All variables included in the model are assessed. Permutations per variable were performed 25 times and performance is assessed based on mean brier score. **(d)** ROC curve. AUROC curve = 0.856.

(a)

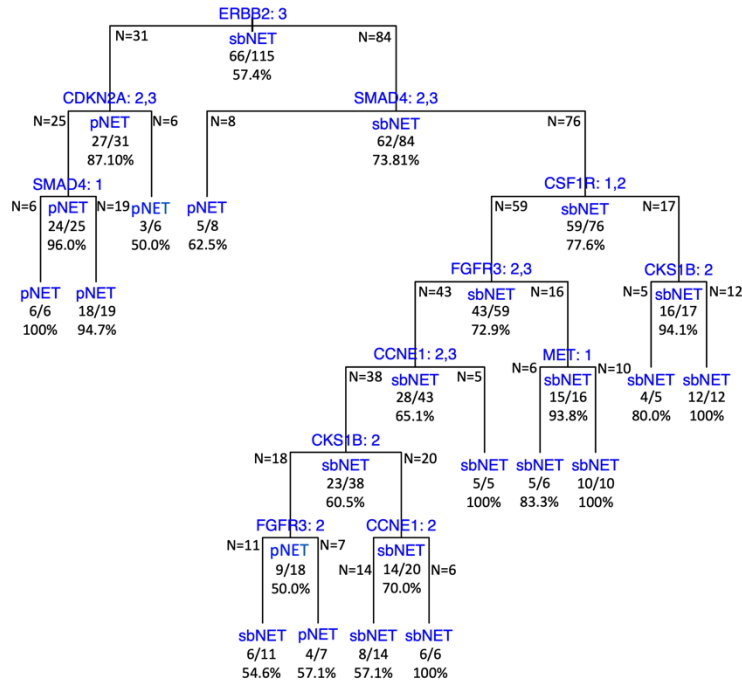

(b)

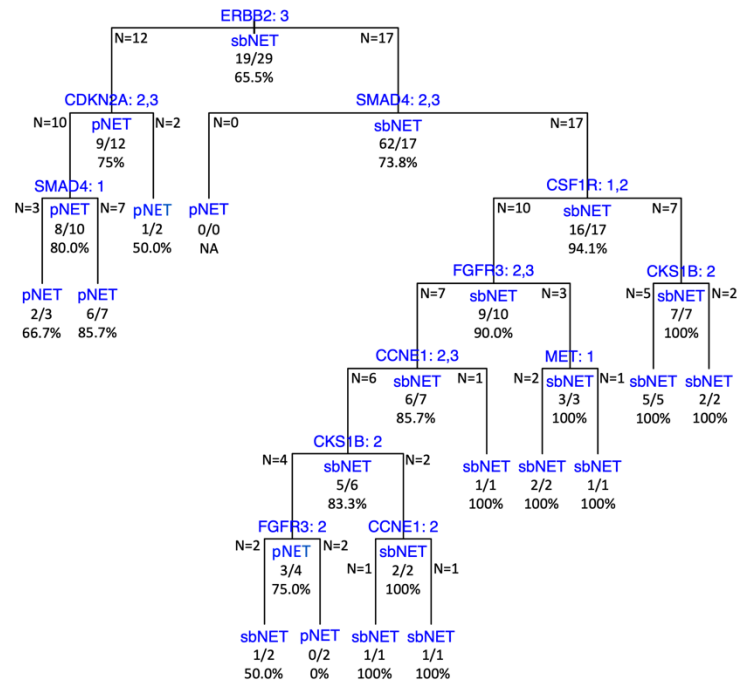

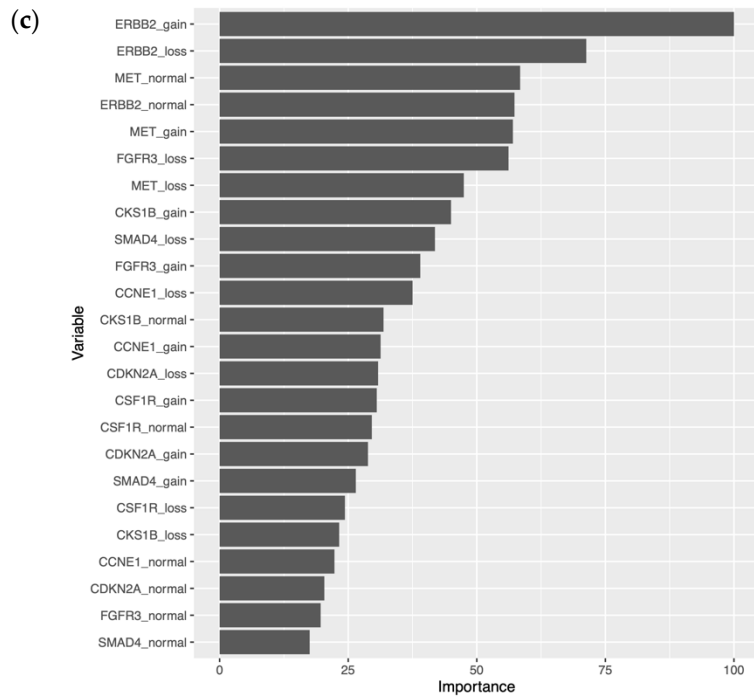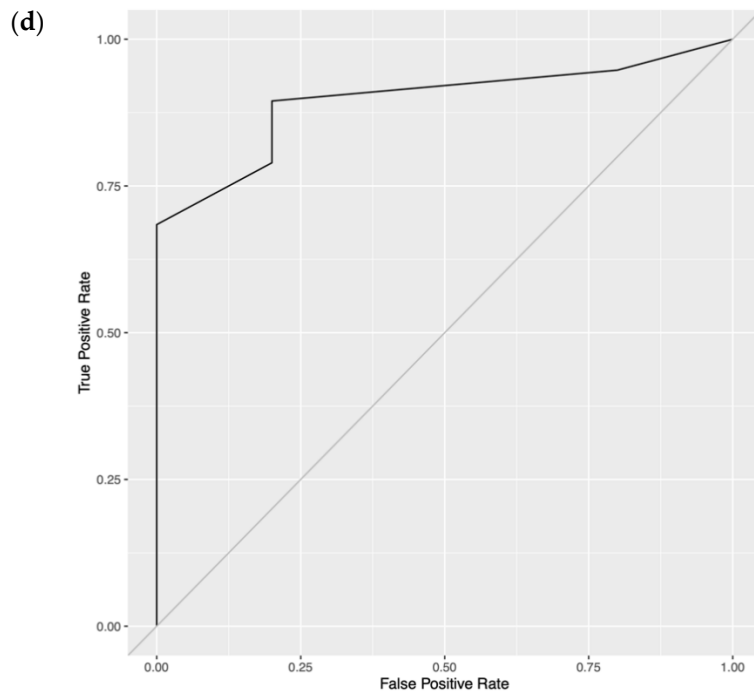

**Supplementary Figure S6.** DT model trained on KNN-imputed data with a transformation of the data to single categorical variables for each biomarker. Training and test sets constructed with random 80/20 dataset split (Training and Test Set 6) for manual Monte Carlo CV. **(a)** Training set DT model plot with internal nodes shown with variables being split with splitting criteria of 1 = loss, 2 = normal, and 3 = gain for number of copies at the genomic regions. Samples with a variable value equal to the splitting criteria are split down the left branch and values different than the splitting criteria are split down the right branch. Terminal nodes show the final classification of the samples with either pNET or sbNET. Classification of sample subsets at internal nodes are shown under horizontal lines and sample numbers of subsets from the split are displayed at the edges of the horizontal lines. Each node lists correctly classified samples as a fraction and percent accuracy. Tree accuracy = 80.0% (92/115) **(b)** Test set DT model plot with same design as (a) with test set data. Tree accuracy = 79.3% (23/29) **(c)** Permutation-based variable importance. All variables included in the model are assessed. Permutations per variable were performed 25 times and performance is assessed based on mean brier score. **(d)** ROC curve. AUROC curve = 0.895.

(a)

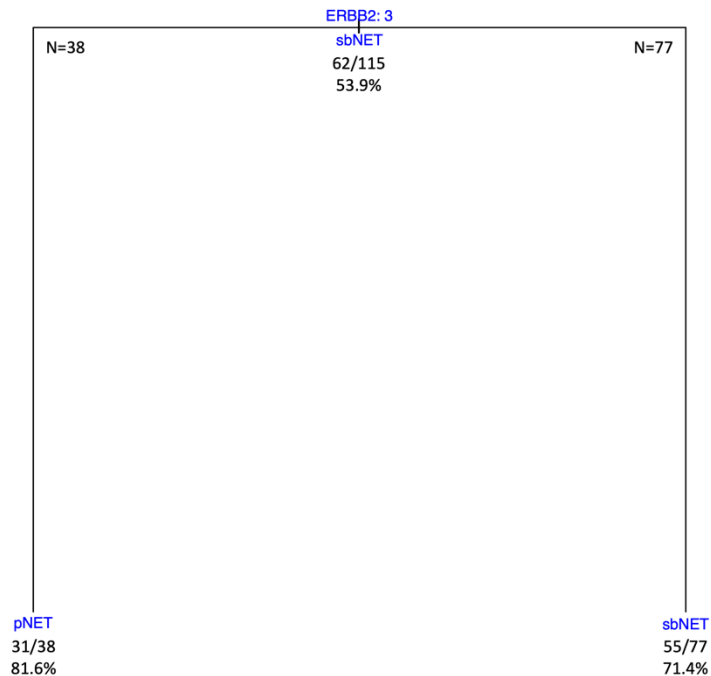

(b)

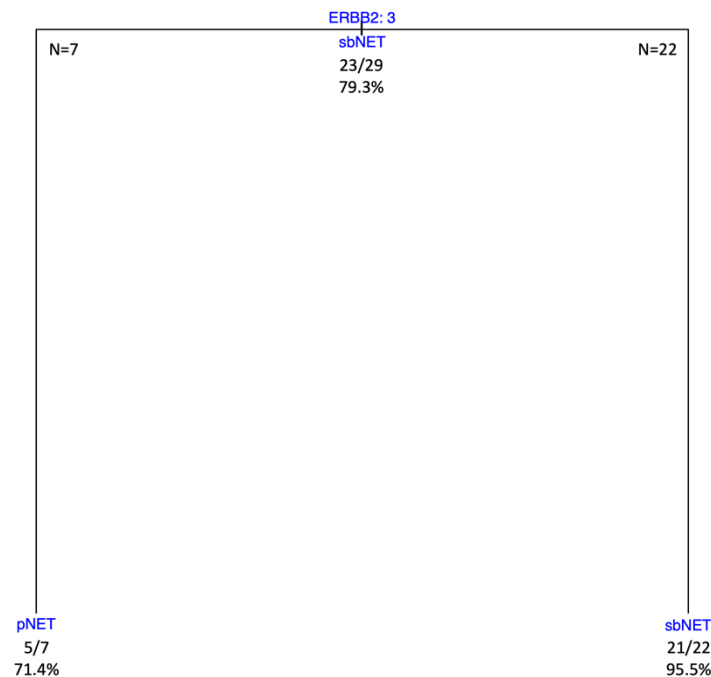

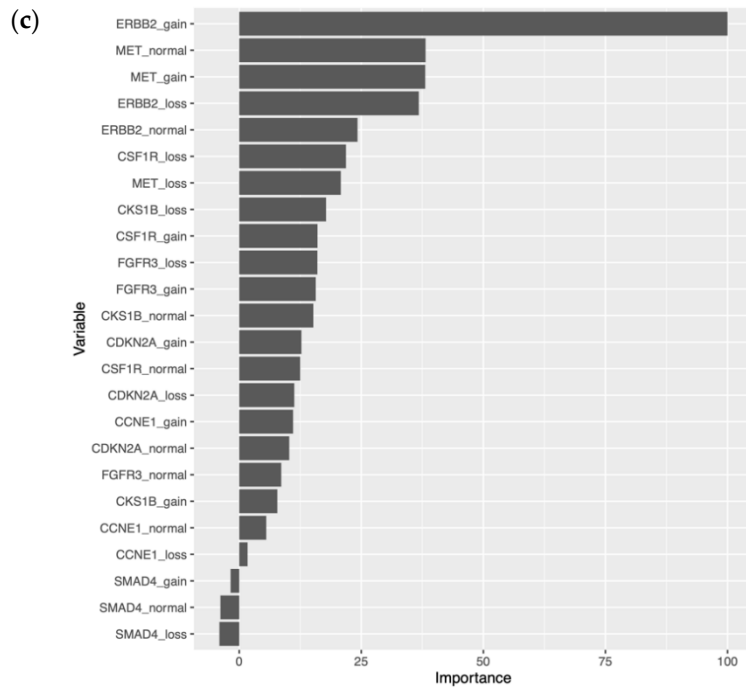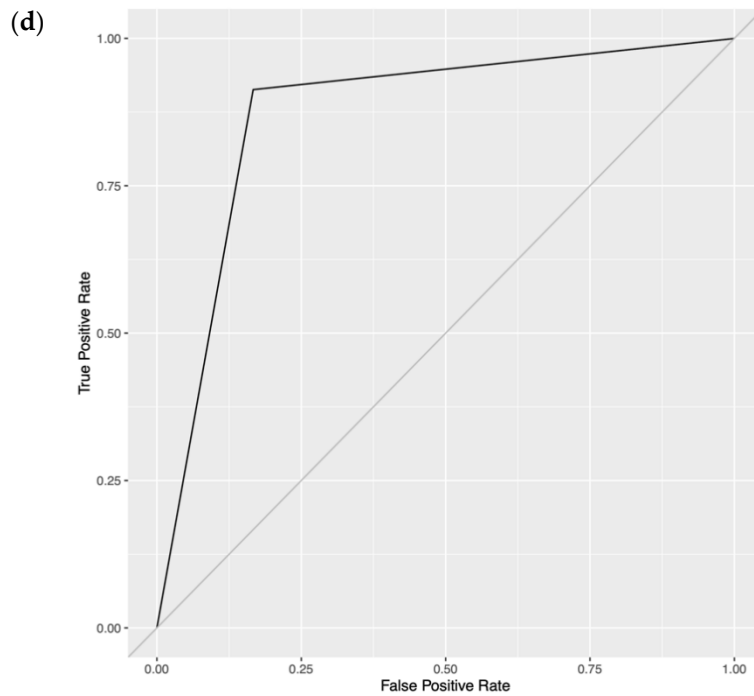

**Supplementary Figure S7.** DT model trained on KNN-imputed data with a transformation of the data to single categorical variables for each biomarker. Training and test sets constructed with random 80/20 dataset split (Training and Test Set 7) for manual Monte Carlo CV. **(a)** Training set DT model plot with internal nodes shown with variables being split with splitting criteria of 1 = loss, 2 = normal, and 3 = gain for number of copies at the genomic regions. Samples with a variable value equal to the splitting criteria are split down the left branch and values different than the splitting criteria are split down the right branch. Terminal nodes show the final classification of the samples with either pNET or sbNET. Classification of sample subsets at internal nodes are shown under horizontal lines and sample numbers of subsets from the split are displayed at the edges of the horizontal lines. Each node lists correctly classified samples as a fraction and percent accuracy. Tree accuracy = 74.8% (86/115) **(b)** Test set DT model plot with same design as (a) with test set data. Tree accuracy = 89.7% (26/29) **(c)** Permutation-based variable importance. All variables included in the model are assessed. Permutations per variable were performed 25 times and performance is assessed based on mean brier score. **(d)** ROC curve. AUROC curve = 0.873.

(a)

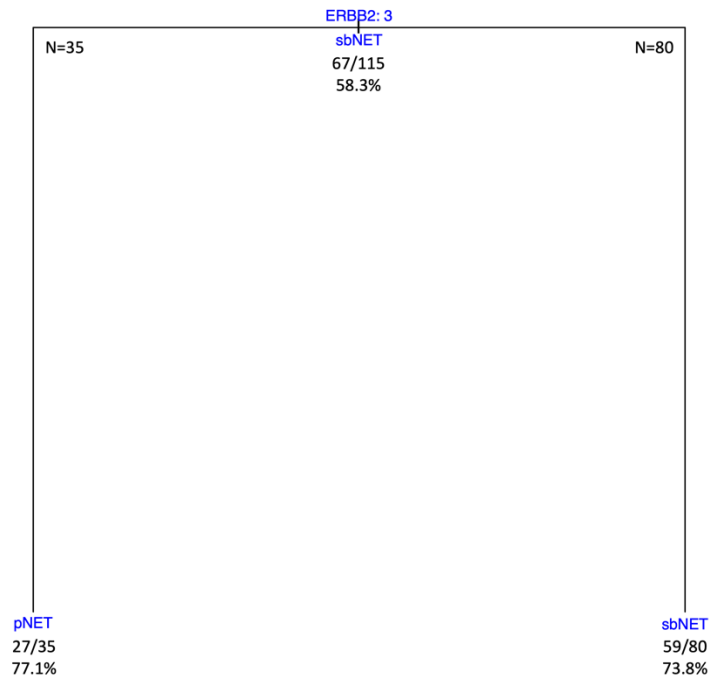

(b)

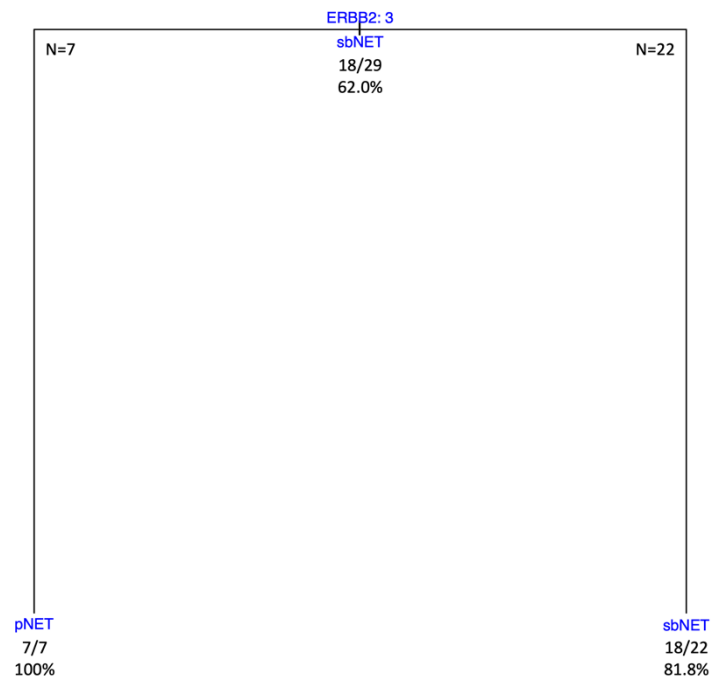

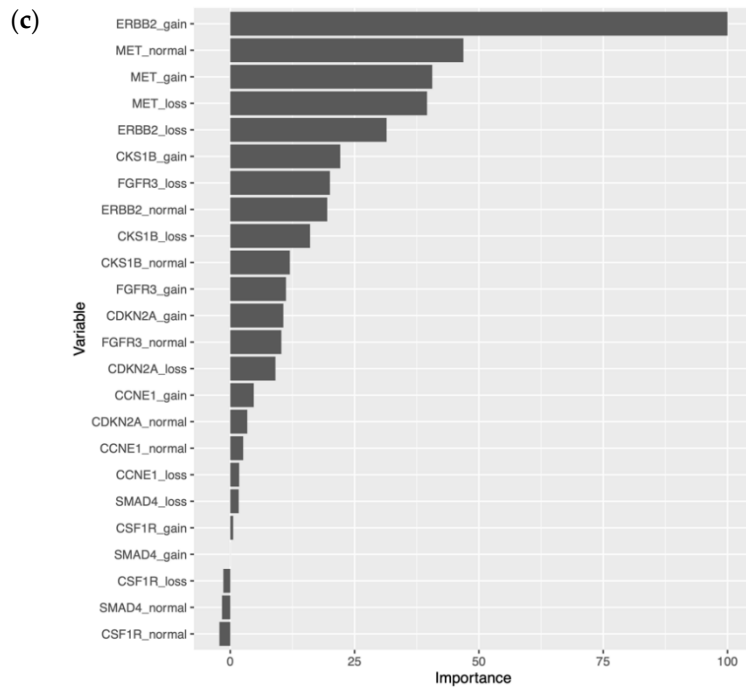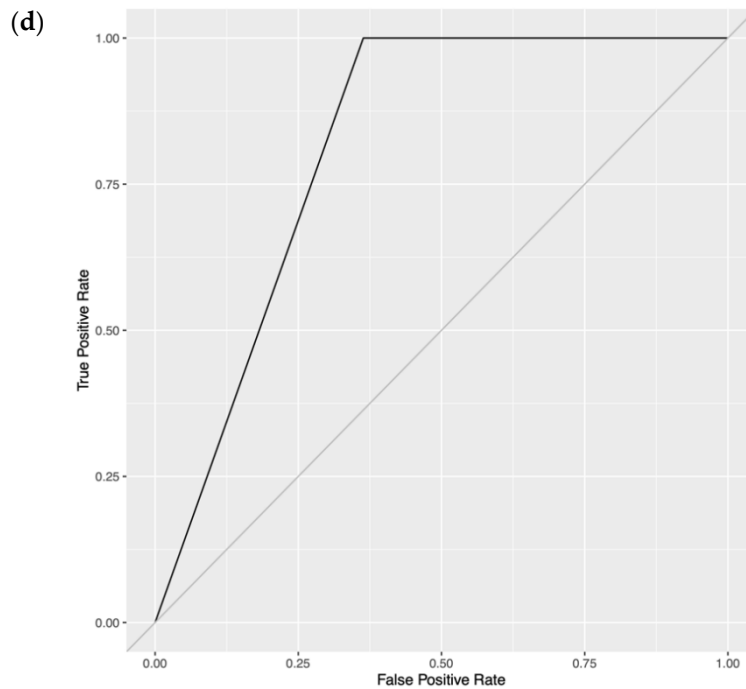

**Supplementary Figure S8.** DT model trained on KNN-imputed data with a transformation of the data to single categorical variables for each biomarker. Training and test sets constructed with random 80/20 dataset split (Training and Test Set 8) for manual Monte Carlo CV. **(a)** Training set DT model plot with internal nodes shown with variables being split with splitting criteria of 1 = loss, 2 = normal, and 3 = gain for number of copies at the genomic regions. Samples with a variable value equal to the splitting criteria are split down the left branch and values different than the splitting criteria are split down the right branch. Terminal nodes show the final classification of the samples with either pNET or sbNET. Classification of sample subsets at internal nodes are shown under horizontal lines and sample numbers of subsets from the split are displayed at the edges of the horizontal lines. Each node lists correctly classified samples as a fraction and percent accuracy. Tree accuracy = 74.8% (86/115) **(b)** Test set DT model plot with same design as (a) with test set data. Tree accuracy = 86.2% (25/29) **(c)** Permutation-based variable importance. All variables included in the model are assessed. Permutations per variable were performed 25 times and performance is assessed based on mean brier score. **(d)** ROC curve. AUROC curve = 0.818.

(a)

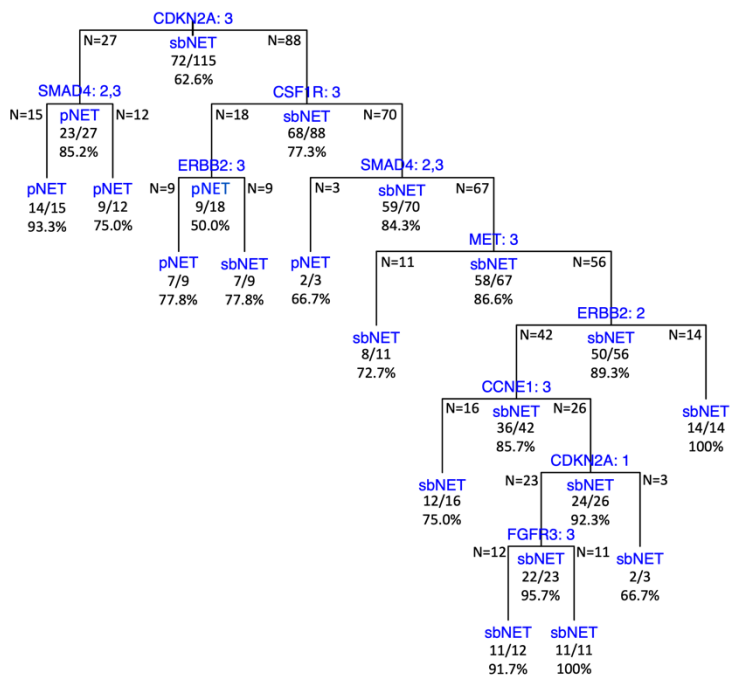

(b)

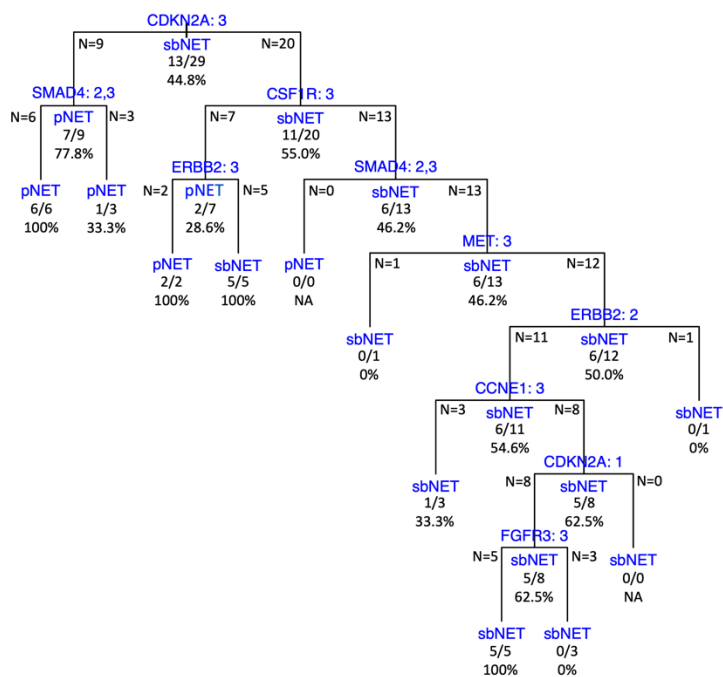

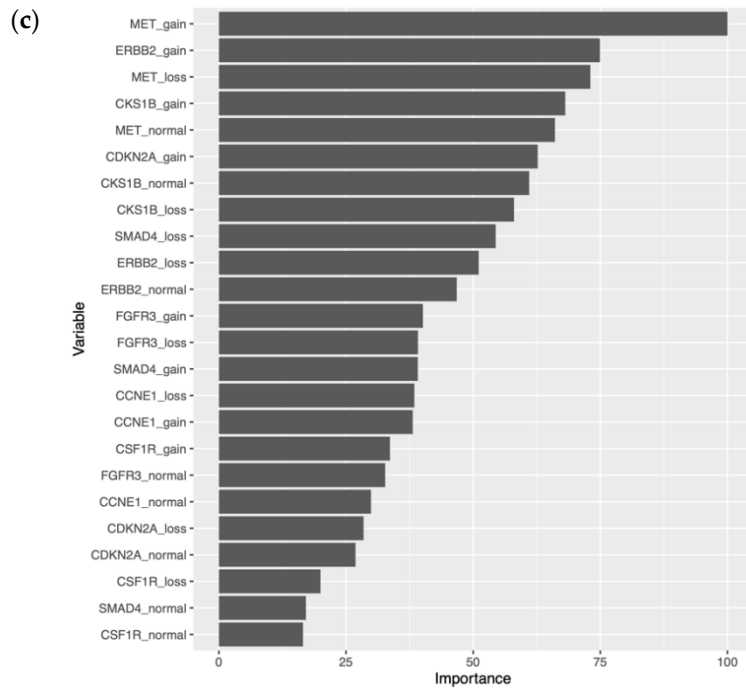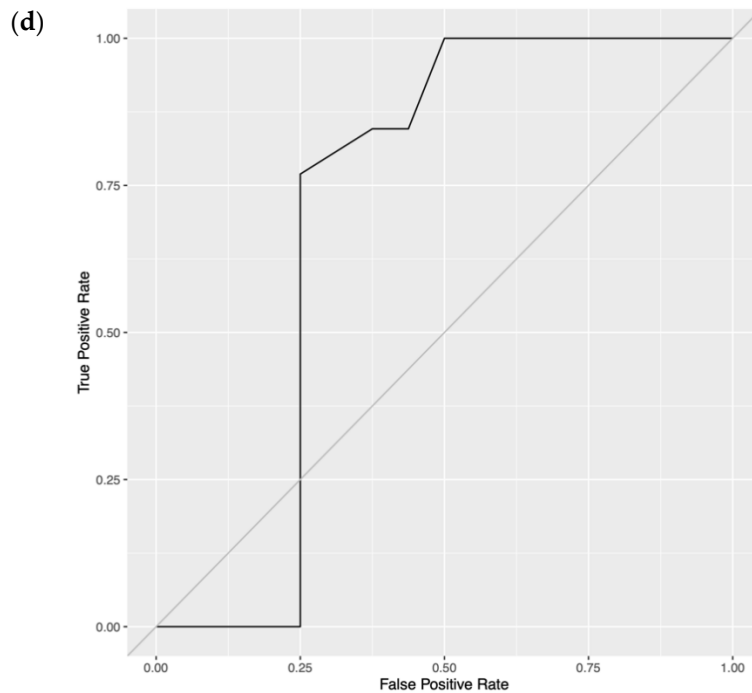

**Supplementary Figure S9.** DT model trained on KNN-imputed data with a transformation of the data to single categorical variables for each biomarker. Training and test sets constructed with random 80/20 dataset split (Training and Test Set 9) for manual Monte Carlo CV. **(a)** Training set DT model plot with internal nodes shown with variables being split with splitting criteria of 1 = loss, 2 = normal, and 3 = gain for number of copies at the genomic regions. Samples with a variable value equal to the splitting criteria are split down the left branch and values different than the splitting criteria are split down the right branch. Terminal nodes show the final classification of the samples with either pNET or sbNET. Classification of sample subsets at internal nodes are shown under horizontal lines and sample numbers of subsets from the split are displayed at the edges of the horizontal lines. Each node lists correctly classified samples as a fraction and percent accuracy. Tree accuracy = 84.4% (97/115) **(b)** Test set DT model plot with same design as (a) with test set data. Tree accuracy = 69.0% (20/29) **(c)** Permutation-based variable importance. All variables included in the model are assessed. Permutations per variable were performed 25 times and performance is assessed based on mean brier score. **(d)** ROC curve. AUROC curve = 0.712.

(a)

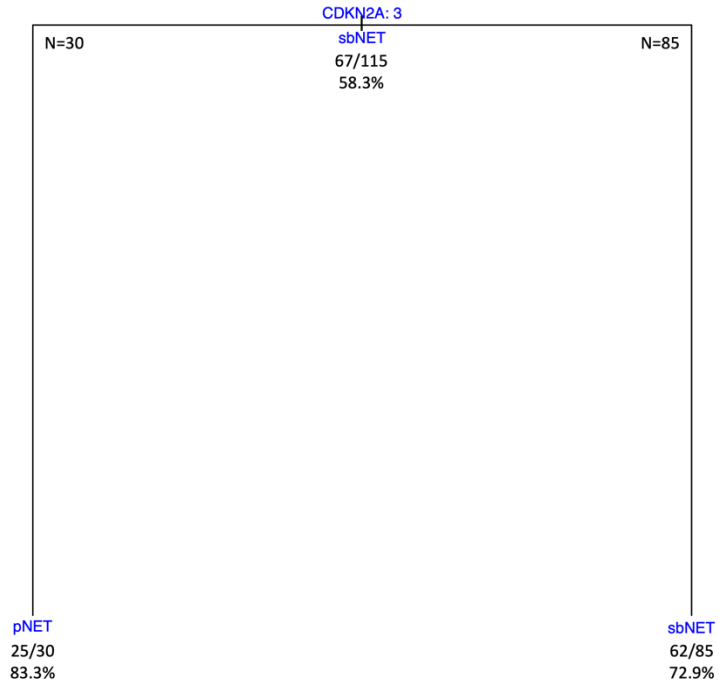

(b)

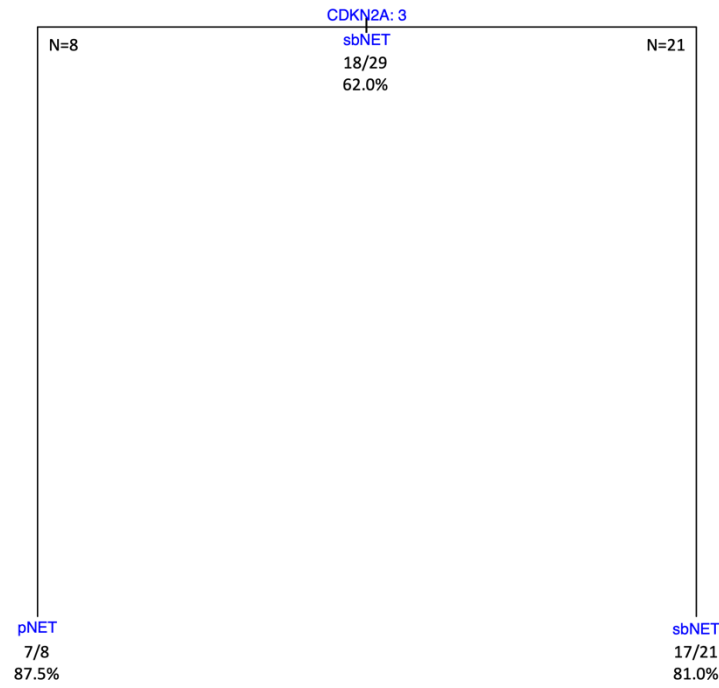

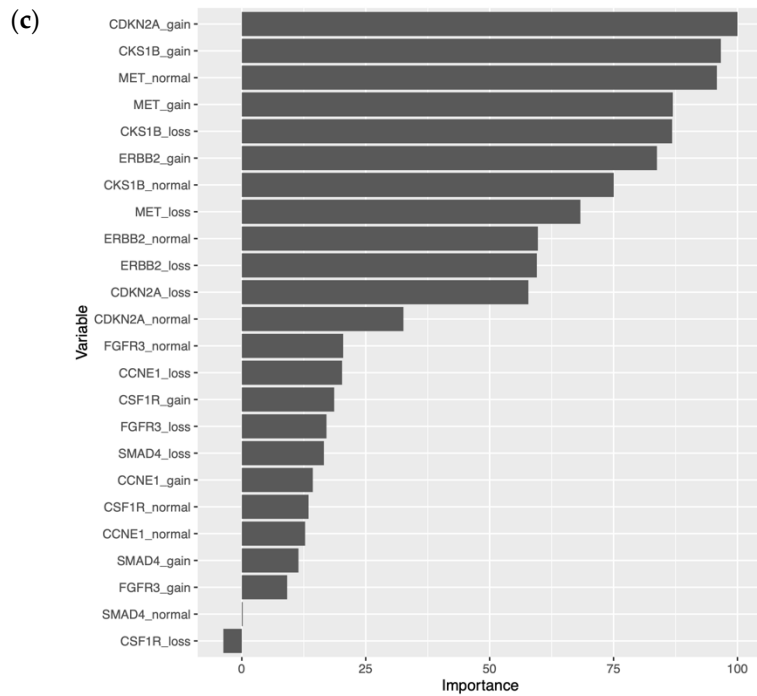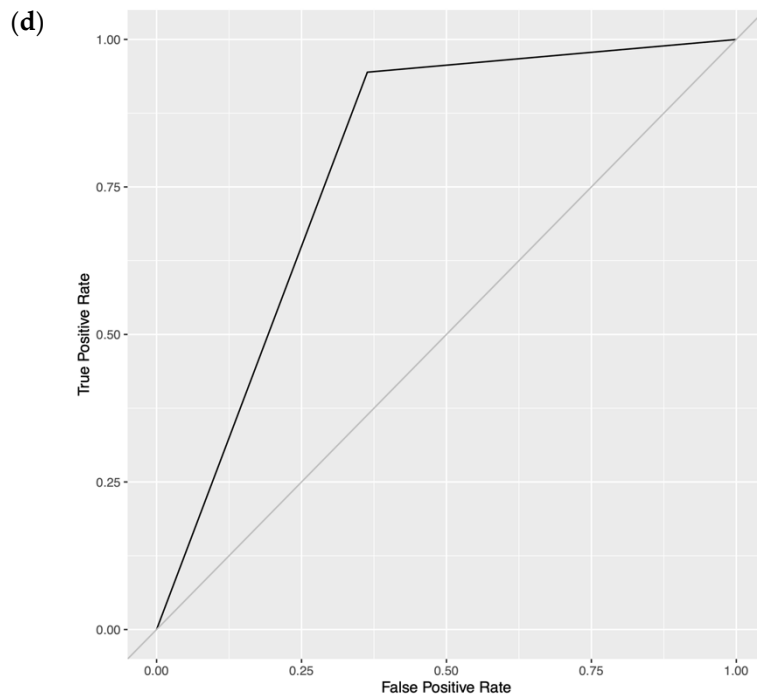

**Supplementary Figure S10.** DT model trained on KNN-imputed data with a transformation of the data to single categorical variables for each biomarker. Training and test sets constructed with random 80/20 dataset split (Training and Test Set 10) for manual Monte Carlo CV. **(a)** Training set DT model plot with internal nodes shown with variables being split with splitting criteria of 1 = loss, 2 = normal, and 3 = gain for number of copies at the genomic regions. Samples with a variable value equal to the splitting criteria are split down the left branch and values different than the splitting criteria are split down the right branch. Terminal nodes show the final classification of the samples with either pNET or sbNET. Classification of sample subsets at internal nodes are shown under horizontal lines and sample numbers of subsets from the split are displayed at the edges of the horizontal lines. Each node lists correctly classified samples as a fraction and percent accuracy. Tree accuracy = 75.7% (87/115) **(b)** Test set DT model plot with same design as (a) with test set data. Tree accuracy = 82.8% (24/29) **(c)** Permutation-based variable importance. All variables included in the model are assessed. Permutations per variable were performed 25 times and performance is assessed based on mean brier score. **(d)** ROC curve. AUROC curve = 0.790.

**Supplementary Table S8.** Counts of biomarker variables included in ten DT models from the manual Monte Carlo CV.

|             | <i>CCNE1</i> | <i>FGFR3</i> | <i>CSF1R</i> | <i>SMAD4</i> | <i>ERBB2</i> | <i>CKS1B</i> | <i>MET</i> | <i>CDKN2A</i> | Total Splits | Terminal Nodes |
|-------------|--------------|--------------|--------------|--------------|--------------|--------------|------------|---------------|--------------|----------------|
| Model 1     | 1            | 1            | 1            | 0            | 2            | 0            | 1          | 0             | 6            | 7              |
| Model 2     | 1            | 1            | 0            | 0            | 1            | 1            | 1          | 0             | 5            | 6              |
| Model 3     | 1            | 1            | 0            | 2            | 1            | 1            | 0          | 1             | 7            | 8              |
| Model 4     | 0            | 0            | 1            | 1            | 1            | 0            | 0          | 0             | 3            | 4              |
| Model 5     | 0            | 0            | 1            | 0            | 1            | 0            | 0          | 1             | 3            | 4              |
| Model 6     | 2            | 2            | 1            | 2            | 1            | 2            | 1          | 1             | 12           | 13             |
| Model 7     | 0            | 0            | 0            | 0            | 1            | 0            | 0          | 0             | 1            | 2              |
| Model 8     | 0            | 0            | 0            | 0            | 1            | 0            | 0          | 0             | 1            | 2              |
| Model 9     | 1            | 1            | 1            | 2            | 2            | 0            | 1          | 2             | 10           | 11             |
| Model 10    | 0            | 0            | 0            | 0            | 0            | 0            | 0          | 1             | 1            | 2              |
| Total Count | 6            | 6            | 5            | 7            | 11           | 4            | 4          | 6             | 49           | 59             |

**Supplementary Table S9.** DT model tables for each of the ten random 80/20 dataset splits for manual Monte Carlo CV and full dataset DT model. Terminal node metrics of training data with model performances.

| Decision Tree Training Set 1 Metrics  |            |                                                                                               |          |       |             |             |                               |
|---------------------------------------|------------|-----------------------------------------------------------------------------------------------|----------|-------|-------------|-------------|-------------------------------|
| Probability                           | Prediction | Branch of Decisions                                                                           |          |       |             |             | Number of Samples (Total=115) |
| 1.000                                 | sbNET      | <i>ERBB2</i> Loss/Normal, <i>CSF1R</i> Gain/Loss, <i>CCNE1</i> Gain, <i>ERBB2</i> Loss        |          |       |             |             | 9/115                         |
| 1.000                                 | sbNET      | <i>ERBB2</i> Loss/Normal, <i>CSF1R</i> Gain/Loss, <i>CCNE1</i> Loss/Normal                    |          |       |             |             | 14/115                        |
| 0.844                                 | pNET       | <i>ERBB2</i> Gain                                                                             |          |       |             |             | 32/115                        |
| 0.800                                 | sbNET      | <i>ERBB2</i> Loss/Normal, <i>CSF1R</i> Normal, <i>FGFR3</i> Gain/Loss, <i>MET</i> Loss/Normal |          |       |             |             | 30/115                        |
| 0.625                                 | sbNET      | <i>ERBB2</i> Loss/Normal, <i>CSF1R</i> Gain/Loss, <i>CCNE1</i> Gain, <i>ERBB2</i> Gain/Normal |          |       |             |             | 8/115                         |
| 0.600                                 | sbNET      | Majority Class                                                                                |          |       |             |             | 69/115                        |
| 0.563                                 | sbNET      | <i>ERBB2</i> Loss/Normal, <i>CSF1R</i> Normal, <i>FGFR3</i> Normal                            |          |       |             |             | 16/115                        |
| 0.500                                 | pNET       | <i>ERBB2</i> Loss/Normal, <i>CSF1R</i> Normal, <i>FGFR3</i> Gain/Loss, <i>MET</i> Gain        |          |       |             |             | 6/115                         |
|                                       |            | Brier Score                                                                                   | Accuracy | Kappa | AUROC Curve | Sensitivity | Specificity                   |
| Tree Performance Metrics              |            | 0.142                                                                                         | 79.1%    | 0.552 | 0.862       | 0.884       | 0.652                         |
| 10-Fold CV Tuning Performance Metrics |            | 0.180                                                                                         | 78.2%    | 0.524 | 0.781       | 0.883       | 0.630                         |
| Held Out Test Performance Metrics     |            | 0.157                                                                                         | 82.8%    | 0.654 | 0.841       | 0.813       | 0.846                         |

| Decision Tree Training Set 2 Metrics  |            |                                                                                                                                         |          |       |             |                                  |             |
|---------------------------------------|------------|-----------------------------------------------------------------------------------------------------------------------------------------|----------|-------|-------------|----------------------------------|-------------|
| Probability                           | Prediction | Branch of Decisions                                                                                                                     |          |       |             | Number of Samples<br>(Total=115) |             |
| 1.000                                 | sbNET      | <i>ERBB2</i> Loss/Normal, <i>FGFR3</i> Loss/Gain, <i>MET</i> Loss/Normal, <i>CCNE1</i> Loss/Gain, <i>CKS1B</i> Loss/Gain                |          |       |             | 21/115                           |             |
| 0.833                                 | sbNET      | <i>ERBB2</i> Loss/Normal, <i>FGFR3</i> Loss/Gain, <i>MET</i> Loss/Normal, <i>CCNE1</i> Loss/Gain, <i>CKS1B</i> Normal                   |          |       |             | 12/115                           |             |
| 0.811                                 | pNET       | <i>ERBB2</i> Gain                                                                                                                       |          |       |             | 37/115                           |             |
| 0.750                                 | sbNET      | <i>ERBB2</i> Loss/Normal, <i>FGFR3</i> Loss/Gain, <i>MET</i> Loss/Normal, <i>CCNE1</i> Normal                                           |          |       |             | 16/115                           |             |
| 0.600                                 | sbNET      | <i>ERBB2</i> Loss/Normal, <i>FGFR3</i> Loss/Gain, <i>MET</i> Gain                                                                       |          |       |             | 10/115                           |             |
| 0.583                                 | sbNET      | Majority Class                                                                                                                          |          |       |             | 67/115                           |             |
| 0.579                                 | sbNET      | <i>ERBB2</i> Loss/Normal, <i>FGFR3</i> Normal                                                                                           |          |       |             | 19/115                           |             |
|                                       |            | Brier Score                                                                                                                             | Accuracy | Kappa | AUROC Curve | Sensitivity                      | Specificity |
| Tree Performance Metrics              |            | 0.151                                                                                                                                   | 78.3%    | 0.538 | 0.847       | 0.896                            | 0.625       |
| 10-Fold CV Tuning Performance Metrics |            | 0.178                                                                                                                                   | 79.3%    | 0.562 | 0.787       | 0.881                            | 0.670       |
| Held Out Test Performance Metrics     |            | 0.200                                                                                                                                   | 72.4%    | 0.393 | 0.710       | 0.833                            | 0.546       |
| Decision Tree Training Set 3 Metrics  |            |                                                                                                                                         |          |       |             |                                  |             |
| Probability                           | Prediction | Branch of Decisions                                                                                                                     |          |       |             | Number of Samples<br>(Total=115) |             |
| 1.000                                 | pNET       | <i>ERBB2</i> Gain, <i>SMAD4</i> Normal/Gain                                                                                             |          |       |             | 7/115                            |             |
| 1.000                                 | sbNET      | <i>ERBB2</i> Loss/Normal, <i>SMAD4</i> Loss, <i>CDKN2A</i> Loss, <i>FGFR3</i> Loss/Gain, <i>CKS1B</i> Loss/Gain, <i>CCNE1</i> Loss/Gain |          |       |             | 17/115                           |             |
| 0.846                                 | sbNET      | <i>ERBB2</i> Loss/Normal, <i>SMAD4</i> Loss, <i>CDKN2A</i> Loss, <i>FGFR3</i> Loss/Gain, <i>CKS1B</i> Loss/Gain, <i>CCNE1</i> Normal    |          |       |             | 13/115                           |             |
| 0.800                                 | pNET       | <i>ERBB2</i> Loss/Normal, <i>SMAD4</i> Normal/Gain                                                                                      |          |       |             | 5/115                            |             |
| 0.750                                 | sbNET      | <i>ERBB2</i> Loss/Normal, <i>SMAD4</i> Loss, <i>CDKN2A</i> Loss, <i>FGFR3</i> Loss/Gain, <i>CKS1B</i> Normal                            |          |       |             | 12/115                           |             |
| 0.720                                 | pNET       | <i>ERBB2</i> Gain, <i>SMAD4</i> Loss                                                                                                    |          |       |             | 25/115                           |             |
| 0.654                                 | sbNET      | <i>ERBB2</i> Loss/Normal, <i>SMAD4</i> Loss, <i>CDKN2A</i> Normal/Gain                                                                  |          |       |             | 26/115                           |             |
| 0.600                                 | sbNET      | <i>ERBB2</i> Loss/Normal, <i>SMAD4</i> Loss, <i>CDKN2A</i> Loss, <i>FGFR3</i> Normal                                                    |          |       |             | 10/115                           |             |
| 0.591                                 | sbNET      | Majority Class                                                                                                                          |          |       |             | 68/115                           |             |
|                                       |            | Brier Score                                                                                                                             | Accuracy | Kappa | AUROC Curve | Sensitivity                      | Specificity |
| Tree Performance Metrics              |            | 0.157                                                                                                                                   | 77.4%    | 0.516 | 0.835       | 0.882                            | 0.617       |
| 10-Fold CV Tuning Performance Metrics |            | 0.228                                                                                                                                   | 63.5%    | 0.250 | 0.696       | 0.662                            | 0.595       |
| Held Out Test Performance Metrics     |            | 0.104                                                                                                                                   | 89.7%    | 0.784 | 0.909       | 0.941                            | 0.833       |

| Decision Tree Training Set 4 Metrics  |            |                                                                                                                                                                    |          |       |             |                                  |             |
|---------------------------------------|------------|--------------------------------------------------------------------------------------------------------------------------------------------------------------------|----------|-------|-------------|----------------------------------|-------------|
| Probability                           | Prediction | Branch of Decisions                                                                                                                                                |          |       |             | Number of Samples<br>(Total=115) |             |
| 0.923                                 | pNET       | <i>ERBB2</i> Gain, <i>SMAD4</i> Normal/Gain                                                                                                                        |          |       |             | 26/115                           |             |
| 0.923                                 | sbNET      | <i>ERBB2</i> Loss/Normal, <i>CSF1R</i> Loss/Gain                                                                                                                   |          |       |             | 26/115                           |             |
| 0.706                                 | sbNET      | <i>ERBB2</i> Loss/Normal, <i>CSF1R</i> Normal                                                                                                                      |          |       |             | 51/115                           |             |
| 0.583                                 | pNET       | <i>ERBB2</i> Gain, <i>SMAD4</i> Loss                                                                                                                               |          |       |             | 12/115                           |             |
| 0.583                                 | sbNET      | Majority Class                                                                                                                                                     |          |       |             | 67/115                           |             |
|                                       |            | Brier Score                                                                                                                                                        | Accuracy | Kappa | AUROC Curve | Sensitivity                      | Specificity |
| Tree Performance Metrics              |            | 0.150                                                                                                                                                              | 79.1%    | 0.558 | 0.832       | 0.896                            | 0.646       |
| 10-Fold CV Tuning Performance Metrics |            | 0.161                                                                                                                                                              | 80.0%    | 0.568 | 0.822       | 0.895                            | 0.665       |
| Held Out Test Performance Metrics     |            | 0.169                                                                                                                                                              | 79.3%    | 0.545 | 0.753       | 0.889                            | 0.636       |
| Decision Tree Training Set 5 Metrics  |            |                                                                                                                                                                    |          |       |             |                                  |             |
| Probability                           | Prediction | Branch of Decisions                                                                                                                                                |          |       |             | Number of Samples<br>(Total=115) |             |
| 0.919                                 | sbNET      | <i>ERBB2</i> Loss/Normal, <i>CSF1R</i> Loss/Gain                                                                                                                   |          |       |             | 37/115                           |             |
| 0.828                                 | pNET       | <i>ERBB2</i> Gain                                                                                                                                                  |          |       |             | 29/115                           |             |
| 0.790                                 | sbNET      | <i>ERBB2</i> Loss/Normal, <i>CSF1R</i> Normal, <i>CDKN2A</i> Loss                                                                                                  |          |       |             | 38/115                           |             |
| 0.644                                 | sbNET      | Majority Class                                                                                                                                                     |          |       |             | 74/115                           |             |
| 0.546                                 | pNET       | <i>ERBB2</i> Loss/Normal, <i>CSF1R</i> Normal, <i>CDKN2A</i> Normal/Gain                                                                                           |          |       |             | 11/115                           |             |
|                                       |            | Brier Score                                                                                                                                                        | Accuracy | Kappa | AUROC Curve | Sensitivity                      | Specificity |
| Tree Performance Metrics              |            | 0.139                                                                                                                                                              | 81.7%    | 0.600 | 0.843       | 0.865                            | 0.732       |
| 10-Fold CV Tuning Performance Metrics |            | 0.194                                                                                                                                                              | 77.3%    | 0.488 | 0.728       | 0.861                            | 0.615       |
| Held Out Test Performance Metrics     |            | 0.131                                                                                                                                                              | 82.8%    | 0.627 | 0.856       | 0.727                            | 0.889       |
| Decision Tree Training Set 6 Metrics  |            |                                                                                                                                                                    |          |       |             |                                  |             |
| Probability                           | Prediction | Branch of Decisions                                                                                                                                                |          |       |             | Number of Samples<br>(Total=115) |             |
| 1.000                                 | pNET       | <i>ERBB2</i> Gain, <i>CDKN2A</i> Normal/Gain, <i>SMAD4</i> Loss                                                                                                    |          |       |             | 6/115                            |             |
| 1.000                                 | sbNET      | <i>ERBB2</i> Loss, <i>SMAD4</i> Loss, <i>CSF1R</i> Loss/Normal, <i>FGFR3</i> Normal/Gain, <i>CCNE1</i> Normal/Gain, <i>CKS1B</i> Loss/Gain, <i>CCNE1</i> Loss/Gain |          |       |             | 6/115                            |             |
| 1.000                                 | sbNET      | <i>ERBB2</i> Loss, <i>SMAD4</i> Loss, <i>CSF1R</i> Loss/Normal, <i>FGFR3</i> Normal/Gain, <i>CCNE1</i> Loss                                                        |          |       |             | 5/115                            |             |
| 1.000                                 | sbNET      | <i>ERBB2</i> Loss, <i>SMAD4</i> Loss, <i>CSF1R</i> Loss/Normal, <i>FGFR3</i> Loss, <i>MET</i> Normal/Gain                                                          |          |       |             | 10/115                           |             |
| 1.000                                 | sbNET      | <i>ERBB2</i> Loss, <i>SMAD4</i> Loss, <i>CSF1R</i> Gain, <i>CKS1B</i> Loss/Gain                                                                                    |          |       |             | 12/115                           |             |
| 0.947                                 | pNET       | <i>ERBB2</i> Gain, <i>CDKN2A</i> Normal/Gain, <i>SMAD4</i> Normal/Gain                                                                                             |          |       |             | 19/115                           |             |

|                                       |            |                                                                                                                                                                 |          |       |             |                               |             |
|---------------------------------------|------------|-----------------------------------------------------------------------------------------------------------------------------------------------------------------|----------|-------|-------------|-------------------------------|-------------|
| 0.833                                 | sbNET      | <i>ERBB2</i> Loss, <i>SMAD4</i> Loss, <i>CSF1R</i> Loss/Normal, <i>FGFR3</i> Loss, <i>MET</i> Loss                                                              |          |       |             | 6/115                         |             |
| 0.800                                 | sbNET      | <i>ERBB2</i> Loss, <i>SMAD4</i> Loss, <i>CSF1R</i> Gain, <i>CKS1B</i> Normal                                                                                    |          |       |             | 5/115                         |             |
| 0.625                                 | pNET       | <i>ERBB2</i> Loss, <i>SMAD4</i> Normal/Gain                                                                                                                     |          |       |             | 8/115                         |             |
| 0.574                                 | sbNET      | Majority Class                                                                                                                                                  |          |       |             | 66/115                        |             |
| 0.571                                 | pNET       | <i>ERBB2</i> Loss, <i>SMAD4</i> Loss, <i>CSF1R</i> Loss/Normal, <i>FGFR3</i> Normal/Gain, <i>CCNE1</i> Normal/Gain, <i>CKS1B</i> Normal, <i>FGFR3</i> Loss/Gain |          |       |             | 7/115                         |             |
| 0.571                                 | sbNET      | <i>ERBB2</i> Loss, <i>SMAD4</i> Loss, <i>CSF1R</i> Loss/Normal, <i>FGFR3</i> Normal/Gain, <i>CCNE1</i> Normal/Gain, <i>CKS1B</i> Loss/Gain, <i>CCNE1</i> Normal |          |       |             | 14/115                        |             |
| 0.546                                 | sbNET      | <i>ERBB2</i> Loss, <i>SMAD4</i> Loss, <i>CSF1R</i> Loss/Normal, <i>FGFR3</i> Normal/Gain, <i>CCNE1</i> Normal/Gain, <i>CKS1B</i> Normal, <i>FGFR3</i> Normal    |          |       |             | 11/115                        |             |
| 0.500                                 | pNET       | <i>ERBB2</i> Gain, <i>CDKN2A</i> Loss                                                                                                                           |          |       |             | 6/115                         |             |
|                                       |            | Brier Score                                                                                                                                                     | Accuracy | Kappa | AUROC Curve | Sensitivity                   | Specificity |
| Tree Performance Metrics              |            | 0.120                                                                                                                                                           | 80.0%    | 0.588 | 0.904       | 0.849                         | 0.735       |
| 10-Fold CV Tuning Performance Metrics |            | 0.164                                                                                                                                                           | 80.4%    | 0.600 | 0.828       | 0.838                         | 0.760       |
| Held Out Test Performance Metrics     |            | 0.138                                                                                                                                                           | 79.3%    | 0.582 | 0.895       | 0.737                         | 0.900       |
| Decision Tree Training Set 7 Metrics  |            |                                                                                                                                                                 |          |       |             |                               |             |
| Probability                           | Prediction | Branch of Decisions                                                                                                                                             |          |       |             | Number of Samples (Total=115) |             |
| 0.816                                 | pNET       | <i>ERBB2</i> Gain                                                                                                                                               |          |       |             | 38/115                        |             |
| 0.714                                 | sbNET      | <i>ERBB2</i> Loss/Normal                                                                                                                                        |          |       |             | 77/115                        |             |
| 0.539                                 | sbNET      | Majority Class                                                                                                                                                  |          |       |             | 62/115                        |             |
|                                       |            | Brier Score                                                                                                                                                     | Accuracy | Kappa | AUC ROC     | Sensitivity                   | Specificity |
| Tree Performance Metrics              |            | 0.186                                                                                                                                                           | 74.8%    | 0.482 | 0.736       | 0.887                         | 0.585       |
| 10-Fold CV Tuning Performance Metrics |            | 0.192                                                                                                                                                           | 74.4%    | 0.468 | 0.729       | 0.888                         | 0.570       |
| Held Out Test Performance Metrics     |            | 0.129                                                                                                                                                           | 89.7%    | 0.703 | 0.873       | 0.913                         | 0.833       |
| Decision Tree Training Set 8 Metrics  |            |                                                                                                                                                                 |          |       |             |                               |             |
| Probability                           | Prediction | Branch of Decisions                                                                                                                                             |          |       |             | Number of Samples (Total=115) |             |
| 0.771                                 | pNET       | <i>ERBB2</i> Gain                                                                                                                                               |          |       |             | 35/115                        |             |
| 0.738                                 | sbNET      | <i>ERBB2</i> Loss/Normal                                                                                                                                        |          |       |             | 80/115                        |             |
| 0.583                                 | sbNET      | Majority Class                                                                                                                                                  |          |       |             | 67/115                        |             |
|                                       |            | Brier Score                                                                                                                                                     | Accuracy | Kappa | AUROC Curve | Sensitivity                   | Specificity |
| Tree Performance Metrics              |            | 0.188                                                                                                                                                           | 74.8%    | 0.461 | 0.722       | 0.881                         | 0.563       |

|                                       |            |                                                                                                                                     |          |       |             |                               |             |
|---------------------------------------|------------|-------------------------------------------------------------------------------------------------------------------------------------|----------|-------|-------------|-------------------------------|-------------|
| 10-Fold CV Tuning Performance Metrics |            | 0.181                                                                                                                               | 76.3%    | 0.499 | 0.765       | 0.864                         | 0.625       |
| Held Out Test Performance Metrics     |            | 0.130                                                                                                                               | 86.2%    | 0.685 | 0.818       | 1.000                         | 0.636       |
| Decision Tree Training Set 9 Metrics  |            |                                                                                                                                     |          |       |             |                               |             |
| Probability                           | Prediction | Branch of Decisions                                                                                                                 |          |       |             | Number of Samples (Total=115) |             |
| 1.000                                 | sbNET      | CDKN2A Loss/Normal, CSF1R Loss/Normal, SMAD4 Loss, MET Loss/Normal, ERBB2 Normal, CCNE1 Loss/Normal, CDKN2A Loss, FGFR3 Loss/Normal |          |       |             | 11/115                        |             |
| 1.000                                 | sbNET      | CDKN2A Loss/Normal, CSF1R Loss/Normal, SMAD4 Loss, MET Loss/Normal, ERBB2 Loss/Gain                                                 |          |       |             | 14/115                        |             |
| 0.933                                 | pNET       | CDKN2A Gain, SMAD4 Nomal/Gain                                                                                                       |          |       |             | 15/115                        |             |
| 0.917                                 | sbNET      | CDKN2A Loss/Normal, CSF1R Loss/Normal, SMAD4 Loss, MET Loss/Normal, ERBB2 Normal, CCNE1 Loss/Normal, CDKN2A Loss, FGFR3 Gain        |          |       |             | 12/115                        |             |
| 0.778                                 | pNET       | CDKN2A Loss/Normal, CSF1R Gain, ERBB2 Gain                                                                                          |          |       |             | 9/115                         |             |
| 0.778                                 | sbNET      | CDKN2A Loss/Normal, CSF1R Gain, ERBB2 Loss/Normal                                                                                   |          |       |             | 9/115                         |             |
| 0.750                                 | pNET       | CDKN2A Gain, SMAD4 Loss                                                                                                             |          |       |             | 12/115                        |             |
| 0.750                                 | sbNET      | CDKN2A Loss/Normal, CSF1R Loss/Normal, SMAD4 Loss, MET Loss/Normal, ERBB2 Normal, CCNE1 Gain                                        |          |       |             | 16/115                        |             |
| 0.727                                 | sbNET      | CDKN2A Loss/Normal, CSF1R Loss/Normal, SMAD4 Loss, MET Gain                                                                         |          |       |             | 11/115                        |             |
| 0.667                                 | pNET       | CDKN2A Loss/Normal, CSF1R Loss/Normal, SMAD4 Normal/Gain                                                                            |          |       |             | 3/115                         |             |
| 0.667                                 | sbNET      | CDKN2A Loss/Normal, CSF1R Loss/Normal, SMAD4 Loss, MET Loss/Normal, ERBB2 Normal, CCNE1 Loss/Normal, CDKN2A Normal/Gain             |          |       |             | 3/115                         |             |
| 0.626                                 | sbNET      | Majority Class                                                                                                                      |          |       |             | 72/115                        |             |
|                                       |            | Brier Score                                                                                                                         | Accuracy | Kappa | AUROC Curve | Sensitivity                   | Specificity |
| Tree Performance Metrics              |            | 0.119                                                                                                                               | 84.4%    | 0.659 | 0.897       | 0.903                         | 0.744       |
| 10-Fold CV Tuning Performance Metrics |            | 0.171                                                                                                                               | 76.6%    | 0.482 | 0.796       | 0.850                         | 0.625       |
| Held Out Test Performance Metrics     |            | 0.252                                                                                                                               | 69.0%    | 0.394 | 0.712       | 0.846                         | 0.563       |
| Decision Tree Training Set 10 Metrics |            |                                                                                                                                     |          |       |             |                               |             |
| Probability                           | Prediction | Branch of Decisions                                                                                                                 |          |       |             | Number of Samples (Total=115) |             |
| 0.833                                 | pNET       | CDKN2A Gain                                                                                                                         |          |       |             | 30/115                        |             |
| 0.729                                 | sbNET      | CDKN2A Loss/Normal                                                                                                                  |          |       |             | 85/115                        |             |
| 0.583                                 | sbNET      | Majority Class                                                                                                                      |          |       |             | 67/115                        |             |
|                                       |            | Brier Score                                                                                                                         | Accuracy | Kappa | AUROC Curve | Sensitivity                   | Specificity |

|                                                 |            |                                      |          |       |             |             |                               |
|-------------------------------------------------|------------|--------------------------------------|----------|-------|-------------|-------------|-------------------------------|
| Tree Performance Metrics                        |            | 0.182                                | 75.7%    | 0.471 | 0.723       | 0.925       | 0.521                         |
| 10-Fold CV Tuning Performance Metrics           |            | 0.201                                | 72.9%    | 0.419 | 0.707       | 0.838       | 0.575                         |
| Held Out Test Performance Metrics               |            | 0.147                                | 82.8%    | 0.613 | 0.790       | 0.944       | 0.636                         |
| Full Dataset Decision Tree Training Set Metrics |            |                                      |          |       |             |             |                               |
| Probability                                     | Prediction | Branch of Decisions                  |          |       |             |             | Number of Samples (Total=144) |
| 0.897                                           | pNET       | ERBB2 Gain, CDKN2A Gain              |          |       |             |             | 29/144                        |
| 0.800                                           | pNET       | ERBB2 Loss/Normal, SMAD4 Normal/Gain |          |       |             |             | 5/144                         |
| 0.796                                           | sbNET      | ERBB2 Loss/Normal, SMAD4 Loss        |          |       |             |             | 93/144                        |
| 0.590                                           | sbNET      | Majority Class                       |          |       |             |             | 85/144                        |
| 0.588                                           | pNET       | ERBB2 Gain, CDKN2A Loss/Normal       |          |       |             |             | 17/144                        |
|                                                 |            | Brier Score                          | Accuracy | Kappa | AUROC Curve | Sensitivity | Specificity                   |
| Tree Performance Metrics                        |            | 0.158                                | 79.2%    | 0.560 | 0.793       | 0.871       | 0.678                         |
| 10-Fold CV Tuning Performance Metrics           |            | 0.161                                | 79.8%    | 0.571 | 0.800       | 0.893       | 0.663                         |

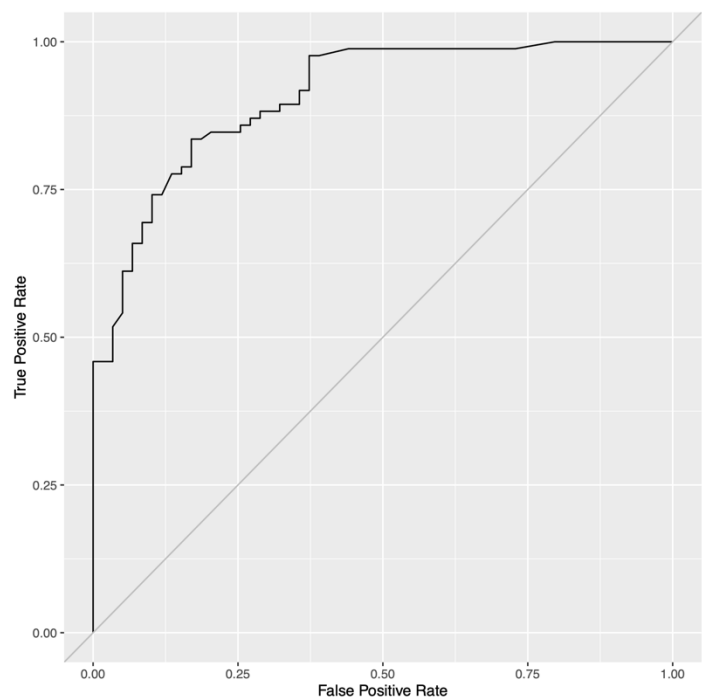

**Supplementary Figure S11.** Consensus tree of manual Monte Carlo CV ten DT models ROC curve. AUROC curve = 0.908.

**Supplementary Table S10.** Consensus tree of manual Monte Carlo CV ten DT models performance metrics.

| Brier Score | Accuracy | Kappa | AUROC Curve | Sensitivity | Specificity |
|-------------|----------|-------|-------------|-------------|-------------|
| 0.135       | 79.2%    | 0.556 | 0.908       | 0.894       | 0.644       |

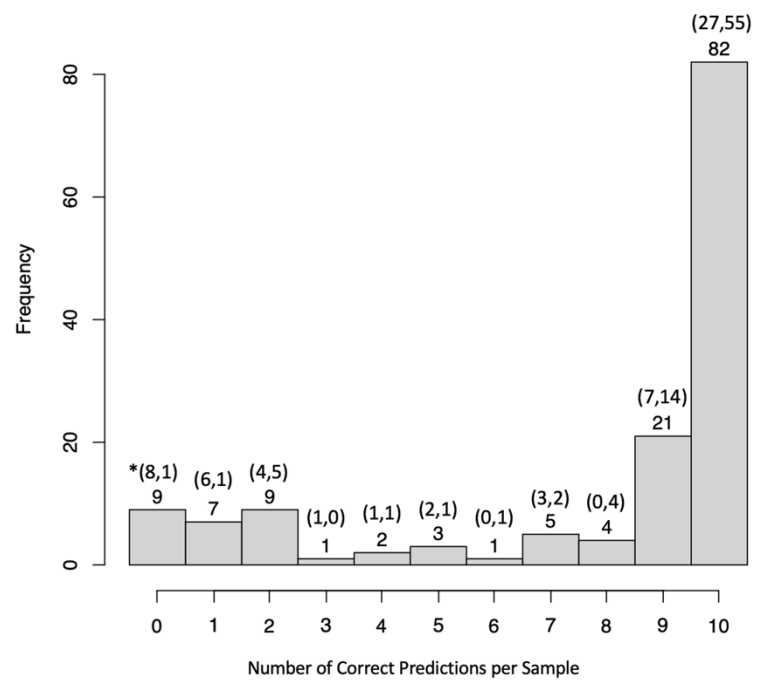

**Supplementary Figure S12.** Histogram of the count of samples correctly classified by the ten DT models from manual Monte Carlo CV analysis. \*(Number of pNET samples, Number of sbNET samples in the subset).
